# Supplementary material for: Synthesis of novel N-9 substituted 6-(4-(4-propoxyphenyl)piperazin-1-yl)-9H-purine derivatives as inducers of apoptosis in MCF-7 breast cancer cells
Source: Royal Society of Chemistry journal article supplement (doi:10.1039/c5ra23242b), 2016-01-01
Supplement: c5ra23242b1.pdf [file c5ra23242b1.pdf]

## Supporting information

Synthesis of novel N-9 substituted 6-(4-(4-propoxyphenyl)piperazin-1-yl)-9H-purine derivatives as inducers of apoptosis in MCF-7 breast cancer cells

Manjunath G. Sunagar,<sup>a</sup> Supreet Gaonkar,<sup>a</sup> Santosh G. Sunagar,<sup>b</sup> Narahari Deshapande,<sup>a</sup> Ningaraddi S. Belavagi,<sup>a</sup> Imtiyaz Ahmed M. Khazi,<sup>\*a</sup>

<sup>a</sup> Department of Chemistry, Pavate Nagar, Karnatak University, Dharwad 580003, Karnataka, India.

<sup>b</sup> Bio-X Institutes, Key Laboratory for the Genetics of Developmental and Neuropsychiatric Disorders (Ministry of Education), Shanghai Jiao Tong University, Shanghai 200240, P.R.China.

\*Correspondence: [drimkorgchem@gmail.com](mailto:drimkorgchem@gmail.com) ; Phone: +91-836-2215286, Extn 29; Fax: +91-836-2771275

**Table 3.** Cytotoxicity of 6-(4-(4-propoxyphenyl)piperazin-1-yl)-9H-purine derivatives (PP05-PP21) against a HeLa cancer cell line in triplicate experiments

| Compounds | Human Cervix Cancer Cell Line HeLa |       |       |       |              |       |       |       |              |       |       |       |                |       |       |       |
|-----------|------------------------------------|-------|-------|-------|--------------|-------|-------|-------|--------------|-------|-------|-------|----------------|-------|-------|-------|
|           | % Control Growth                   |       |       |       |              |       |       |       |              |       |       |       |                |       |       |       |
|           | Drug Concentrations (µg/mL)        |       |       |       |              |       |       |       |              |       |       |       |                |       |       |       |
|           | Experiment 1                       |       |       |       | Experiment 2 |       |       |       | Experiment 3 |       |       |       | Average Values |       |       |       |
|           | 10                                 | 20    | 40    | 80    | 10           | 20    | 40    | 80    | 10           | 20    | 40    | 80    | 10             | 20    | 40    | 80    |
| PP-5      | 100.0                              | 100.0 | 100.0 | 100.0 | 100.0        | 100.0 | 100.0 | 100.0 | 100.0        | 100.0 | 100.0 | 100.0 | 100.0          | 100.0 | 100.0 | 100.0 |
| PP-6      | 99.2                               | 98.1  | 96.1  | 93.2  | 96.3         | 92.2  | 90.0  | 89.1  | 95.1         | 93.4  | 92.1  | 89.9  | 96.8           | 94.5  | 92.7  | 90.7  |
| PP-7      | 100.0                              | 100.0 | 100.0 | 100.0 | 100.0        | 100.0 | 100.0 | 100.0 | 100.0        | 100.0 | 100.0 | 100.0 | 100.0          | 100.0 | 100.0 | 100.0 |
| PP-8      | 100.0                              | 100.0 | 100.0 | 94.8  | 100.0        | 100.0 | 100.0 | 100.0 | 100.0        | 100.0 | 100.0 | 100.0 | 100.0          | 100.0 | 100.0 | 98.3  |
| PP-9      | 71.5                               | 62.5  | 46.8  | 32.9  | 87.6         | 81.8  | 61.1  | 44.2  | 77.0         | 68.2  | 47.8  | 37.1  | 78.7           | 70.8  | 51.9  | 38.1  |
| PP-10     | 100.0                              | 100.0 | 100.0 | 100.0 | 100.0        | 100.0 | 100.0 | 100.0 | 100.0        | 100.0 | 100.0 | 100.0 | 100.0          | 100.0 | 100.0 | 100.0 |
| PP-11     | 98.8                               | 97.2  | 80.1  | 75.7  | 100.0        | 100.0 | 97.3  | 86.2  | 100.0        | 100.0 | 97.6  | 78.4  | 99.6           | 99.1  | 91.7  | 80.1  |
| PP-12     | 100.0                              | 100.0 | 100.0 | 92.2  | 100.0        | 100.0 | 100.0 | 100.0 | 100.0        | 100.0 | 100.0 | 100.0 | 100.0          | 100.0 | 100.0 | 97.4  |
| PP-13     | 100.0                              | 100.0 | 100.0 | 100.0 | 100.0        | 100.0 | 100.0 | 100.0 | 100.0        | 100.0 | 100.0 | 100.0 | 100.0          | 100.0 | 100.0 | 100.0 |
| PP-14     | 100.0                              | 100.0 | 100.0 | 100.0 | 100.0        | 100.0 | 100.0 | 100.0 | 100.0        | 100.0 | 100.0 | 100.0 | 100.0          | 100.0 | 100.0 | 100.0 |
| PP-15     | 100.0                              | 100.0 | 100.0 | 100.0 | 100.0        | 100.0 | 100.0 | 100.0 | 100.0        | 100.0 | 100.0 | 100.0 | 100.0          | 100.0 | 100.0 | 100.0 |
| PP-16     | 100.0                              | 100.0 | 100.0 | 100.0 | 100.0        | 100.0 | 100.0 | 100.0 | 100.0        | 100.0 | 100.0 | 100.0 | 100.0          | 100.0 | 100.0 | 100.0 |
| PP-17     | 100.0                              | 100.0 | 100.0 | 100.0 | 100.0        | 100.0 | 100.0 | 100.0 | 100.0        | 100.0 | 100.0 | 100.0 | 100.0          | 100.0 | 100.0 | 100.0 |
| PP-18     | 100.0                              | 100.0 | 98.3  | 97.1  | 100.0        | 100.0 | 99.2  | 98.4  | 99.1         | 97.3  | 96.8  | 95.7  | 99.7           | 99.1  | 98.1  | 97.0  |
| PP19      | 100.0                              | 100.0 | 100.0 | 100.0 | 100.0        | 100.0 | 100.0 | 100.0 | 100.0        | 100.0 | 100.0 | 100.0 | 100.0          | 100.0 | 100.0 | 100.0 |
| PP-20     | 100.0                              | 100.0 | 100.0 | 100.0 | 100.0        | 100.0 | 100.0 | 100.0 | 100.0        | 100.0 | 100.0 | 100.0 | 100.0          | 100.0 | 100.0 | 100.0 |
| PP-21     | 100.0                              | 100.0 | 99.5  | 97.2  | 100.0        | 99.1  | 96.2  | 94.1  | 99.2         | 97.5  | 94.6  | 92.1  | 99.7           | 98.8  | 96.7  | 94.4  |
| ADR       | -76.3                              | -77.5 | -79.3 | -81.0 | -71.4        | -74.7 | -79.4 | -80.2 | -72.5        | -75.5 | -78.2 | -80.6 | -73.4          | -75.9 | -79.0 | -80.6 |

**Table 4.** Cytotoxicity of 6-(4-(4-propoxyphenyl)piperazin-1-yl)-9H-purine derivatives (PP05-PP21) against a HCT-15 cancer cell line in triplicate experiments

| Human Colon Cancer Cell Line HCT-15 |                             |       |       |       |              |       |       |       |              |       |       |       |                |       |       |       |
|-------------------------------------|-----------------------------|-------|-------|-------|--------------|-------|-------|-------|--------------|-------|-------|-------|----------------|-------|-------|-------|
| Compounds                           | % Control Growth            |       |       |       |              |       |       |       |              |       |       |       |                |       |       |       |
|                                     | Drug Concentrations (µg/mL) |       |       |       |              |       |       |       |              |       |       |       |                |       |       |       |
|                                     | Experiment 1                |       |       |       | Experiment 2 |       |       |       | Experiment 3 |       |       |       | Average Values |       |       |       |
|                                     | 10                          | 20    | 40    | 80    | 10           | 20    | 40    | 80    | 10           | 20    | 40    | 80    | 10             | 20    | 40    | 80    |
| PP-5                                | 100.0                       | 100.0 | 100.0 | 100.0 | 100.0        | 100.0 | 100.0 | 100.0 | 100.0        | 100.0 | 100.0 | 100.0 | 100.0          | 100.0 | 100.0 | 100.0 |
| PP-6                                | 100.0                       | 100.0 | 100.0 | 100.0 | 100.0        | 100.0 | 100.0 | 100.0 | 100.0        | 100.0 | 100.0 | 100.0 | 100.0          | 100.0 | 100.0 | 100.0 |
| PP-7                                | 100.0                       | 100.0 | 100.0 | 100.0 | 100.0        | 100.0 | 100.0 | 100.0 | 100.0        | 100.0 | 100.0 | 100.0 | 100.0          | 100.0 | 100.0 | 100.0 |
| PP-8                                | 100.0                       | 100.0 | 100.0 | 100.0 | 100.0        | 100.0 | 100.0 | 100.0 | 100.0        | 100.0 | 100.0 | 100.0 | 100.0          | 100.0 | 100.0 | 100.0 |
| PP-9                                | 100.0                       | 100.0 | 100.0 | 100.0 | 100.0        | 100.0 | 100.0 | 100.0 | 100.0        | 100.0 | 100.0 | 100.0 | 100.0          | 100.0 | 100.0 | 100.0 |
| PP-10                               | 100.0                       | 100.0 | 100.0 | 100.0 | 100.0        | 100.0 | 100.0 | 100.0 | 100.0        | 100.0 | 100.0 | 100.0 | 100.0          | 100.0 | 100.0 | 100.0 |
| PP-11                               | 100.0                       | 100.0 | 97.7  | 96.7  | 100.0        | 98.9  | 91.2  | 88.2  | 100.0        | 100.0 | 100.0 | 96.5  | 100.0          | 99.6  | 96.3  | 93.8  |
| PP-12                               | 100.0                       | 100.0 | 100.0 | 100.0 | 100.0        | 100.0 | 100.0 | 100.0 | 100.0        | 100.0 | 100.0 | 100.0 | 100.0          | 100.0 | 100.0 | 100.0 |
| PP-13                               | 100.0                       | 100.0 | 100.0 | 100.0 | 100.0        | 100.0 | 100.0 | 100.0 | 100.0        | 100.0 | 100.0 | 100.0 | 100.0          | 100.0 | 100.0 | 100.0 |
| PP-14                               | 100.0                       | 100.0 | 100.0 | 100.0 | 100.0        | 100.0 | 96.6  | 97.4  | 100.0        | 100.0 | 100.0 | 100.0 | 100.0          | 100.0 | 98.9  | 99.1  |
| PP-15                               | 100.0                       | 100.0 | 100.0 | 95.8  | 100.0        | 100.0 | 100.0 | 100.0 | 100.0        | 100.0 | 100.0 | 100.0 | 100.0          | 100.0 | 100.0 | 98.6  |
| PP-16                               | 100.0                       | 100.0 | 100.0 | 100.0 | 100.0        | 100.0 | 100.0 | 100.0 | 100.0        | 100.0 | 100.0 | 100.0 | 100.0          | 100.0 | 100.0 | 100.0 |
| PP-17                               | 100.0                       | 100.0 | 100.0 | 98.2  | 100.0        | 100.0 | 100.0 | 100.0 | 100.0        | 100.0 | 100.0 | 93.9  | 100.0          | 100.0 | 100.0 | 97.4  |
| PP-18                               | 100.0                       | 100.0 | 100.0 | 100.0 | 100.0        | 100.0 | 100.0 | 100.0 | 100.0        | 100.0 | 100.0 | 100.0 | 100.0          | 100.0 | 100.0 | 100.0 |
| PP-19                               | 100.0                       | 100.0 | 100.0 | 100.0 | 100.0        | 100.0 | 100.0 | 100.0 | 100.0        | 100.0 | 100.0 | 100.0 | 100.0          | 100.0 | 100.0 | 100.0 |
| PP-20                               | 100.0                       | 100.0 | 100.0 | 100.0 | 100.0        | 100.0 | 100.0 | 100.0 | 100.0        | 100.0 | 100.0 | 100.0 | 100.0          | 100.0 | 100.0 | 100.0 |
| PP-21                               | 99.5                        | 98.8  | 98.2  | 97.6  | 99.1         | 98.8  | 97.9  | 97.1  | 99.3         | 98.7  | 97.9  | 97.4  | 99.3           | 98.7  | 98.0  | 97.3  |
| ADR                                 | -26.7                       | -27.9 | -29.3 | -32.0 | -19.2        | -20.5 | -25.0 | -34.4 | -19.6        | -27.3 | -28.4 | -29.9 | -21.8          | -25.2 | -27.6 | -32.1 |

**Table 5.** Cytotoxicity of 6-(4-(4-propoxyphenyl)piperazin-1-yl)-9H-purine derivatives (PP05-PP21) against a MCF-7 cancer cell line in triplicate experiments

| Human Breast Cancer Cell Line MCF7 |                             |       |       |       |              |       |       |       |              |       |       |       |                |       |       |       |
|------------------------------------|-----------------------------|-------|-------|-------|--------------|-------|-------|-------|--------------|-------|-------|-------|----------------|-------|-------|-------|
| Compounds                          | % Control Growth            |       |       |       |              |       |       |       |              |       |       |       |                |       |       |       |
|                                    | Drug Concentrations (µg/mL) |       |       |       |              |       |       |       |              |       |       |       |                |       |       |       |
|                                    | Experiment 1                |       |       |       | Experiment 2 |       |       |       | Experiment 3 |       |       |       | Average Values |       |       |       |
|                                    | 10                          | 20    | 40    | 80    | 10           | 20    | 40    | 80    | 10           | 20    | 40    | 80    | 10             | 20    | 40    | 80    |
| PP-5                               | 98.1                        | 95.2  | 94.4  | 93.6  | 97.1         | 96.2  | 94.3  | 92.1  | 97.3         | 95.7  | 92.4  | 90.0  | 97.5           | 95.7  | 93.6  | 91.9  |
| PP-6                               | 100.0                       | 99.8  | 96.1  | 94.7  | 99.2         | 97.1  | 94.3  | 93.1  | 98.2         | 97.2  | 95.1  | 92.1  | 99.1           | 98.0  | 95.1  | 93.3  |
| PP-7                               | 100.8                       | 98.6  | 97.1  | 95.6  | 106.7        | 98.0  | 89.8  | 98.9  | 104.6        | 100.4 | 98.7  | 94.8  | 104.0          | 99.0  | 95.2  | 96.4  |
| PP-8                               | 98.2                        | 90.7  | 83.4  | 83.1  | 102.1        | 90.7  | 91.5  | 97.0  | 101.2        | 99.8  | 94.7  | 94.8  | 100.5          | 93.7  | 89.9  | 91.6  |
| PP-9                               | 53.1                        | 41.0  | 33.3  | 31.1  | 64.3         | 42.5  | 31.1  | 34.2  | 58.4         | 50.5  | 41.6  | 32.3  | 58.6           | 44.6  | 35.4  | 32.5  |
| PP-10                              | 100.0                       | 100.0 | 100.0 | 100.0 | 100.0        | 100.0 | 100.0 | 100.0 | 100.0        | 100.0 | 100.0 | 100.0 | 100.0          | 100.0 | 100.0 | 100.0 |
| PP-11                              | 88.8                        | 79.3  | 74.9  | 78.3  | 100.5        | 84.5  | 81.3  | 79.8  | 98.5         | 90.0  | 89.4  | 80.1  | 95.9           | 84.6  | 81.9  | 79.4  |
| PP-12                              | 95.3                        | 88.3  | 88.6  | 96.9  | 103.8        | 92.4  | 93.4  | 98.2  | 103.9        | 97.9  | 96.1  | 99.2  | 101.0          | 92.9  | 92.7  | 98.1  |
| PP-13                              | 97.6                        | 92.4  | 96.6  | 93.0  | 104.9        | 96.4  | 97.1  | 103.2 | 104.4        | 100.5 | 99.7  | 99.0  | 102.3          | 96.4  | 97.8  | 98.4  |
| PP-14                              | 96.6                        | 91.9  | 91.4  | 96.3  | 96.2         | 95.5  | 97.3  | 96.4  | 99.9         | 95.6  | 92.3  | 93.6  | 97.6           | 94.3  | 93.7  | 95.4  |
| PP-15                              | 99.6                        | 95.1  | 94.5  | 96.9  | 94.6         | 94.1  | 100.4 | 101.2 | 99.2         | 92.0  | 93.5  | 104.1 | 97.8           | 93.7  | 96.1  | 100.8 |
| PP-16                              | 91.1                        | 88.4  | 87.6  | 85.6  | 96.6         | 92.4  | 91.2  | 91.6  | 97.2         | 89.8  | 85.4  | 90.1  | 95.0           | 90.2  | 88.1  | 89.1  |
| PP-17                              | 34.8                        | 30.9  | 28.3  | 28.8  | 32.4         | 30.7  | 28.0  | 31.2  | 38.0         | 31.4  | 26.2  | 29.2  | 35.0           | 31.0  | 27.5  | 29.8  |
| PP-18                              | 96.1                        | 93.5  | 91.6  | 89.8  | 94.3         | 92.1  | 90.0  | 88.5  | 95.1         | 93.2  | 90.1  | 87.0  | 85.1           | 92.9  | 90.5  | 88.4  |
| PP-19                              | 96.0                        | 93.4  | 91.1  | 88.0  | 94.1         | 93.7  | 90.8  | 86.3  | 96.8         | 94.3  | 92.8  | 90.8  | 95.6           | 93.8  | 91.5  | 88.3  |
| PP-20                              | 89.6                        | 86.4  | 84.5  | 82.1  | 88.3         | 87.6  | 83.4  | 81.6  | 88.9         | 86.3  | 82.5  | 80.0  | 88.9           | 86.7  | 83.4  | 81.2  |
| PP-21                              | 86.8                        | 82.1  | 79.3  | 74.4  | 84.3         | 80.1  | 78.4  | 75.1  | 80.2         | 83.8  | 80.1  | 77.3  | 85.4           | 82.0  | 79.2  | 75.6  |
| ADR                                | -0.8                        | -7.9  | -23.6 | -56.0 | -7.0         | -5.6  | -17.1 | -40.8 | -8.1         | -5.5  | -7.1  | -41.5 | -5.3           | -6.3  | -15.9 | -46.1 |

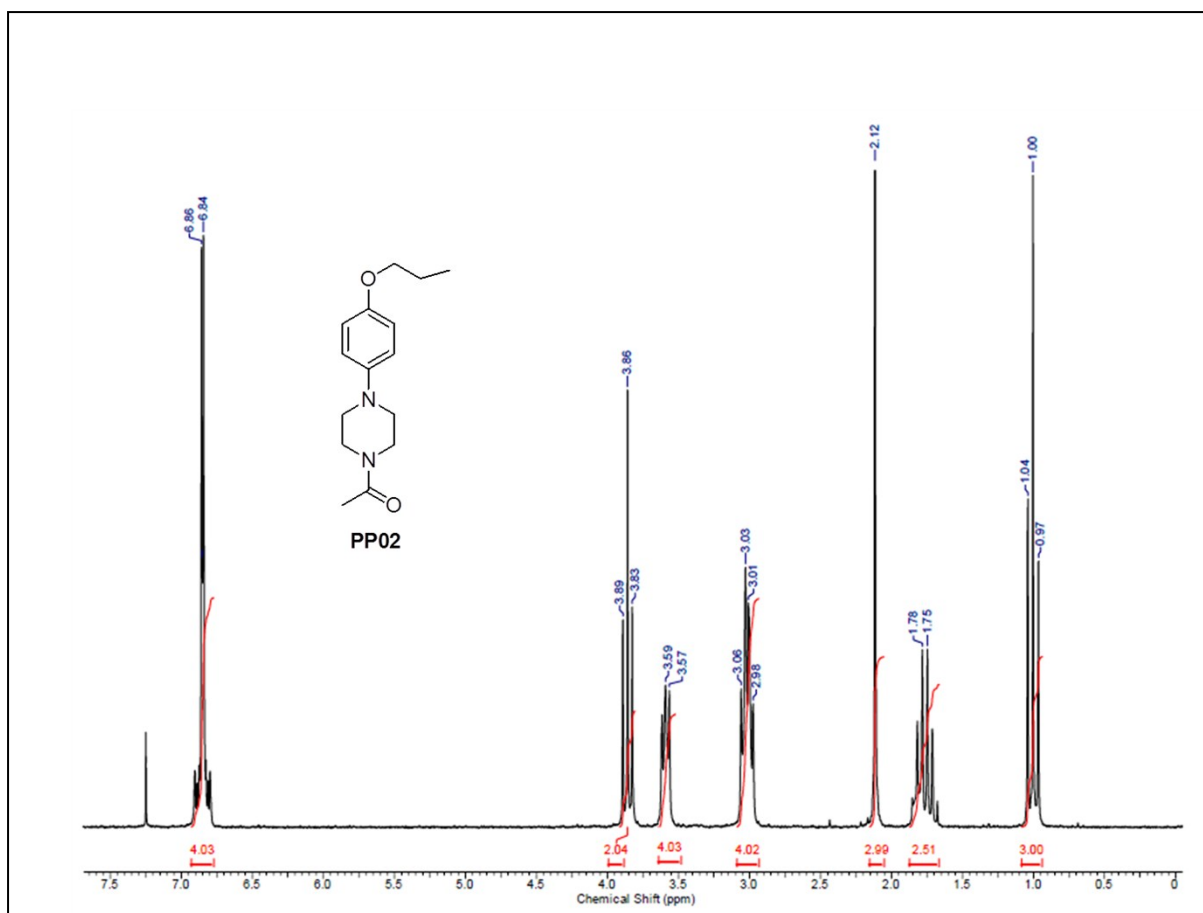

**<sup>1</sup>H NMR SPECTRUM OF COMPOUND PP02**

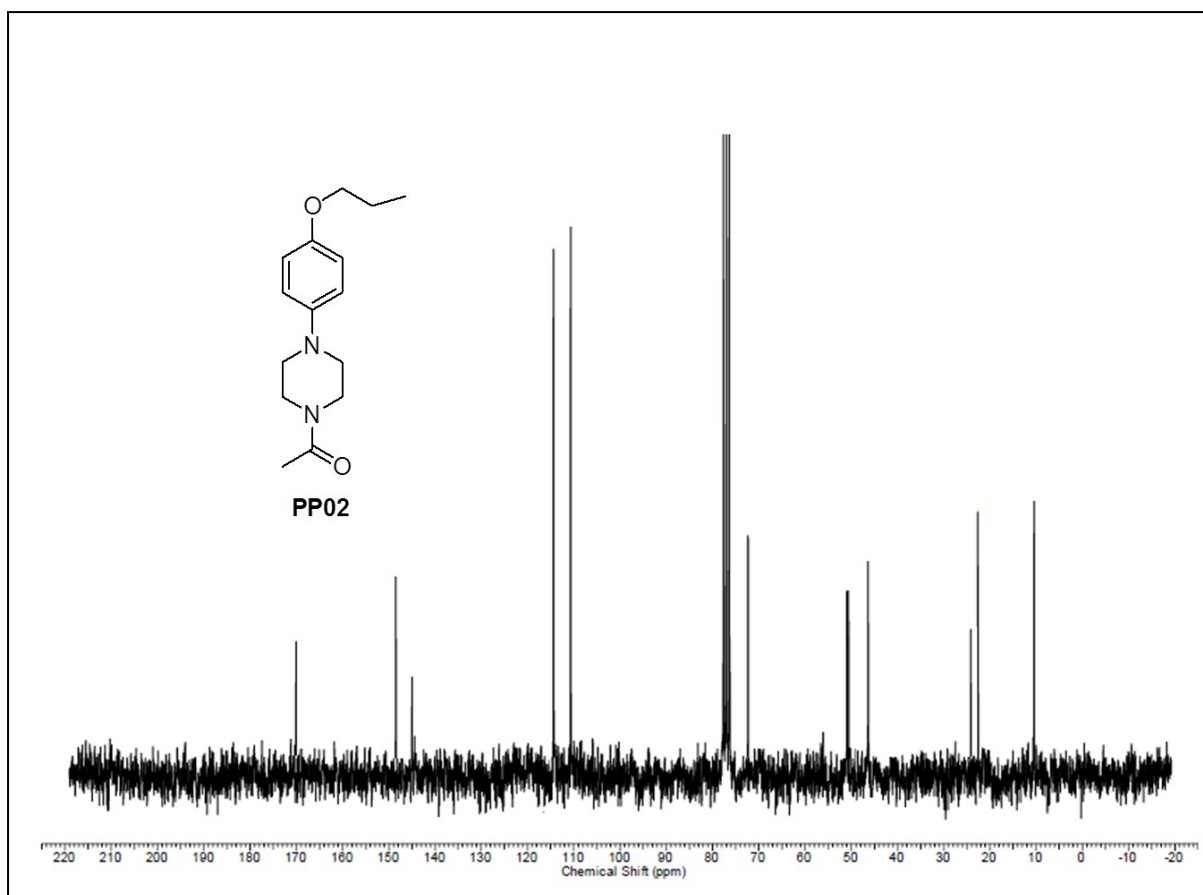

**$^{13}\text{C}$  NMR SPECTRUM OF COMPOUND PP02**

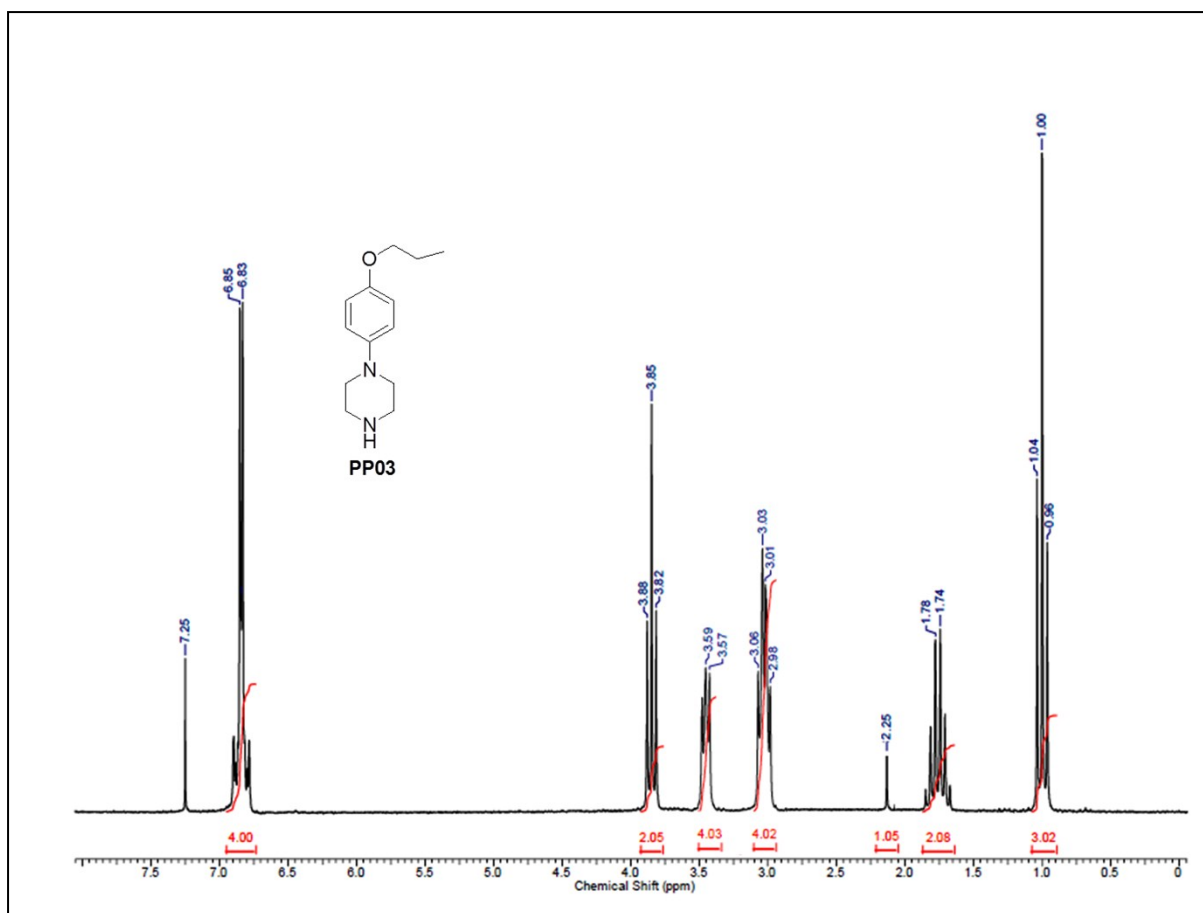

<sup>1</sup>H NMR SPECTRUM OF COMPOUND PP03

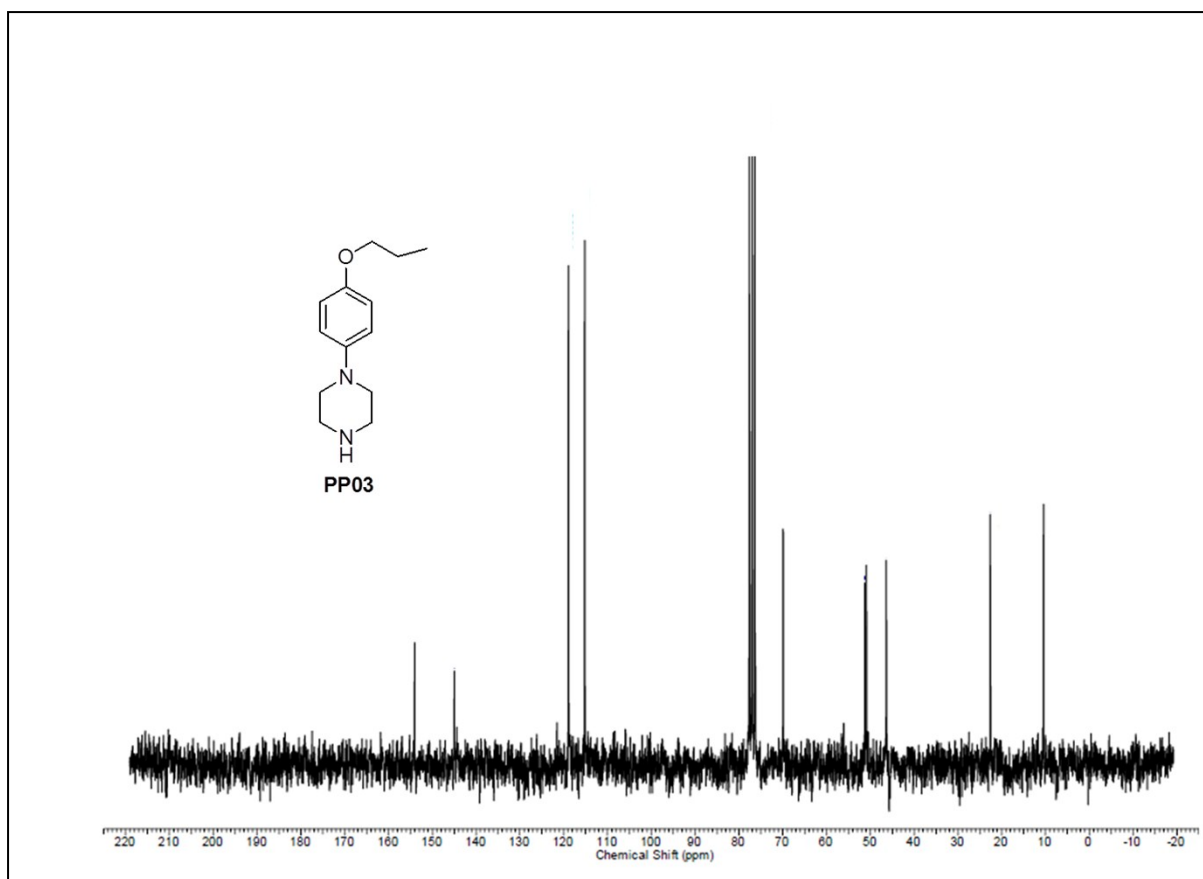

$^{13}\text{C}$  NMR SPECTRUM OF COMPOUND PP03



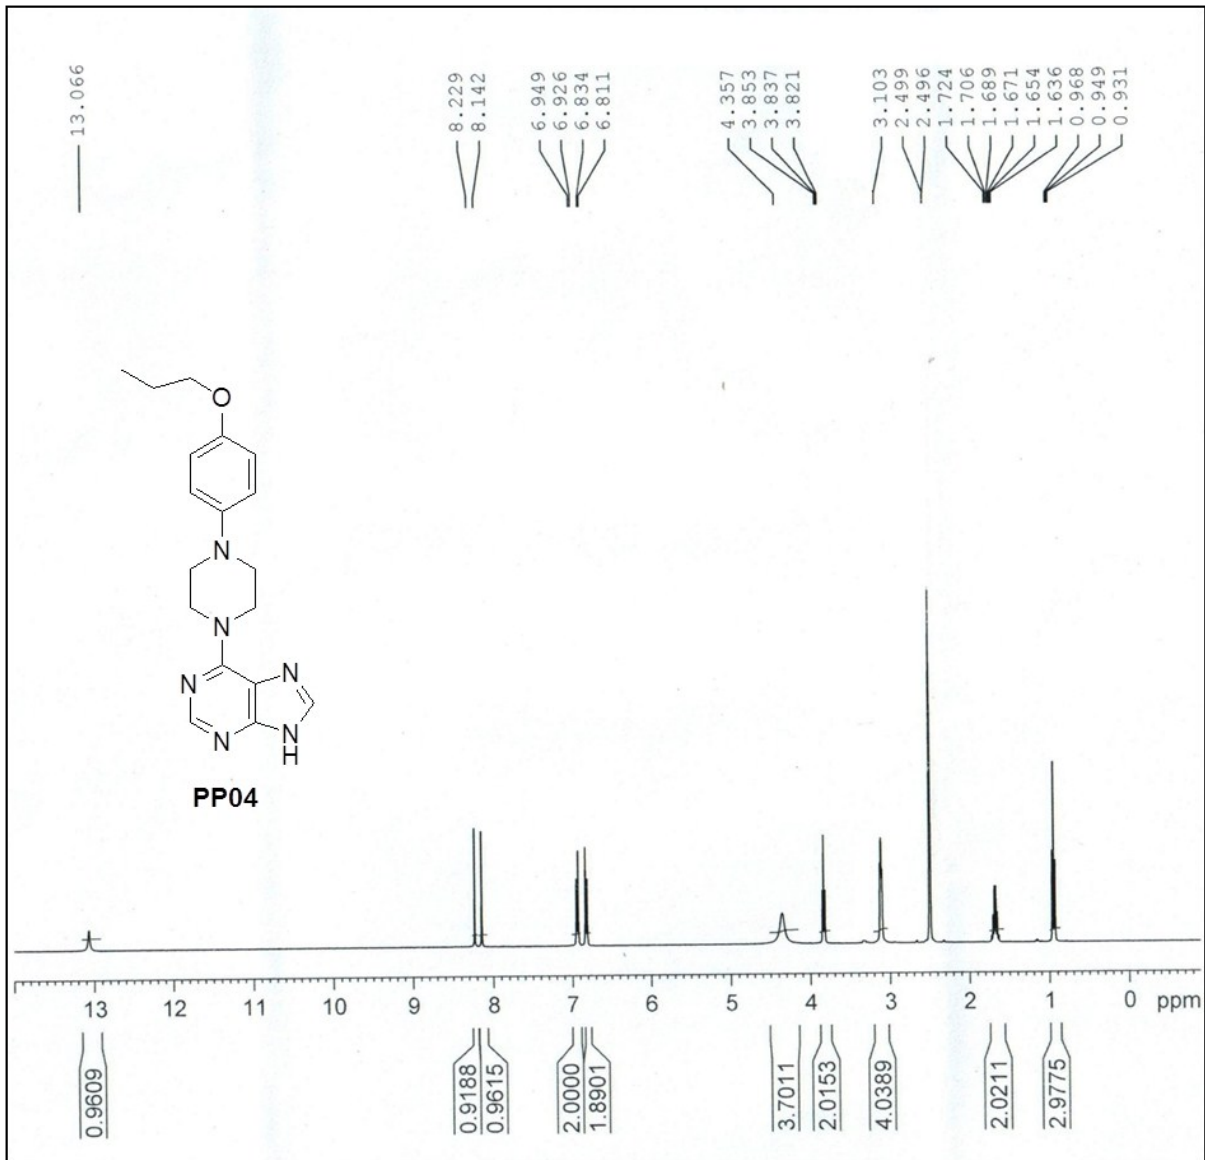

**<sup>1</sup>H NMR SPECTRUM OF COMPOUND PP04**

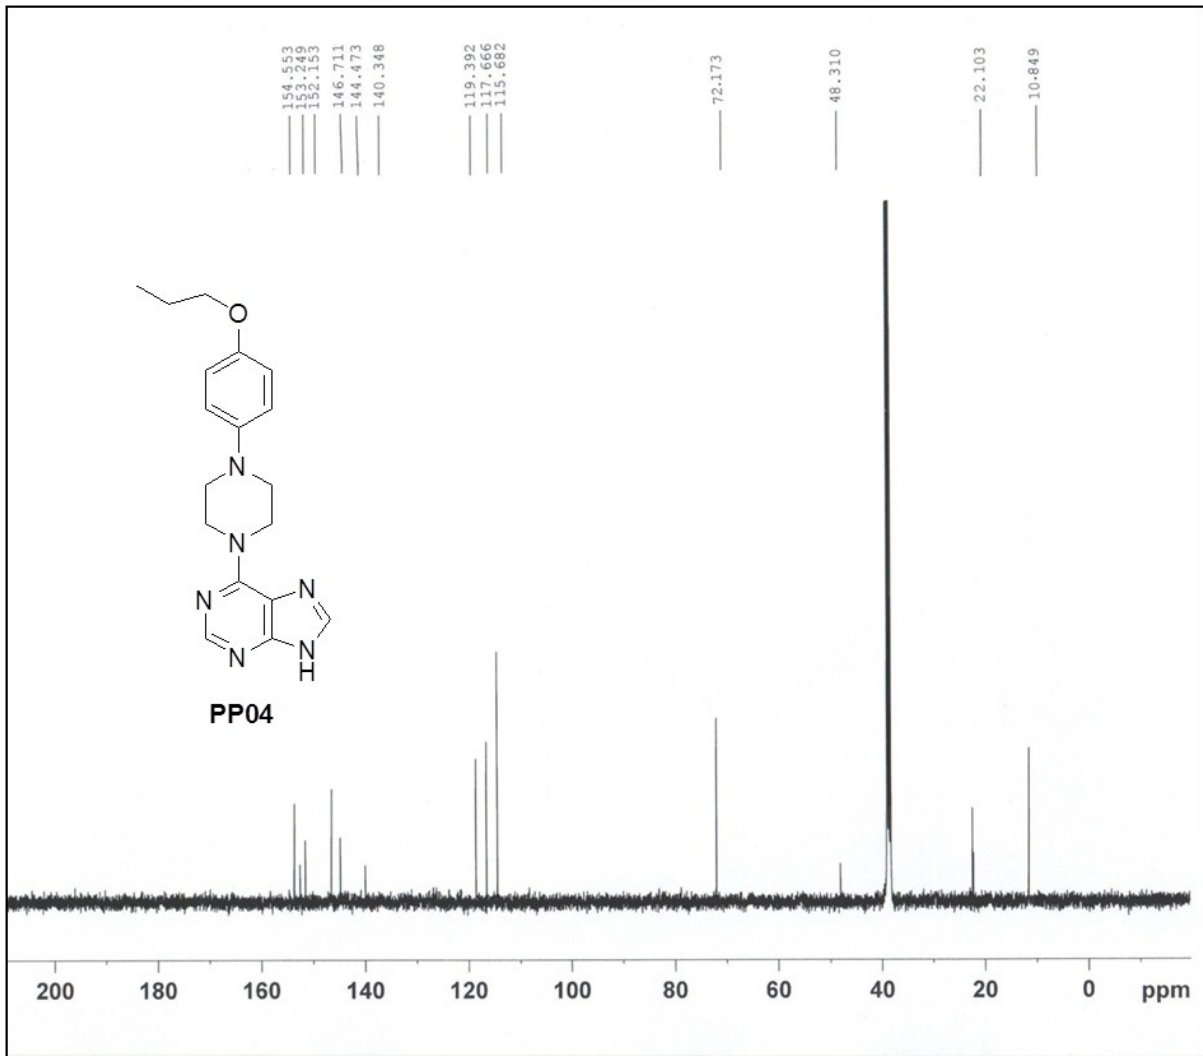

<sup>13</sup>C NMR SPECTRUM OF COMPOUND PP04

Method info : Column-Ascentis C18 (75X4.6mm) 2.7micron,  
 Mobile phase A: ACN B :THF C :0.1% $\text{HCOOH}$  in water Flow = 1.0ml/min,  
 Time (min.): %A %B %C  
 0 95 3 2  
 5 80 18 2  
 10 50 48 2  
 10.1 0 98 2  
 12 0 98 2  
 12.1 95 3 2  
 17 95 3 2

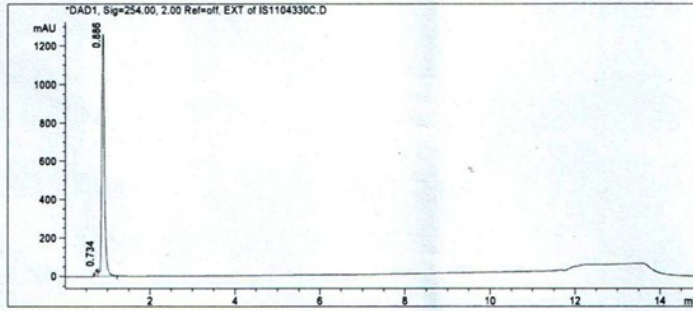

| Peak No | RT min | Area     | Area % |
|---------|--------|----------|--------|
| 1       | 0.734  | 132.686  | 2.335  |
| 2       | 0.886  | 5550.221 | 97.665 |

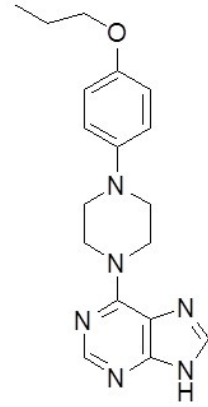

PP04

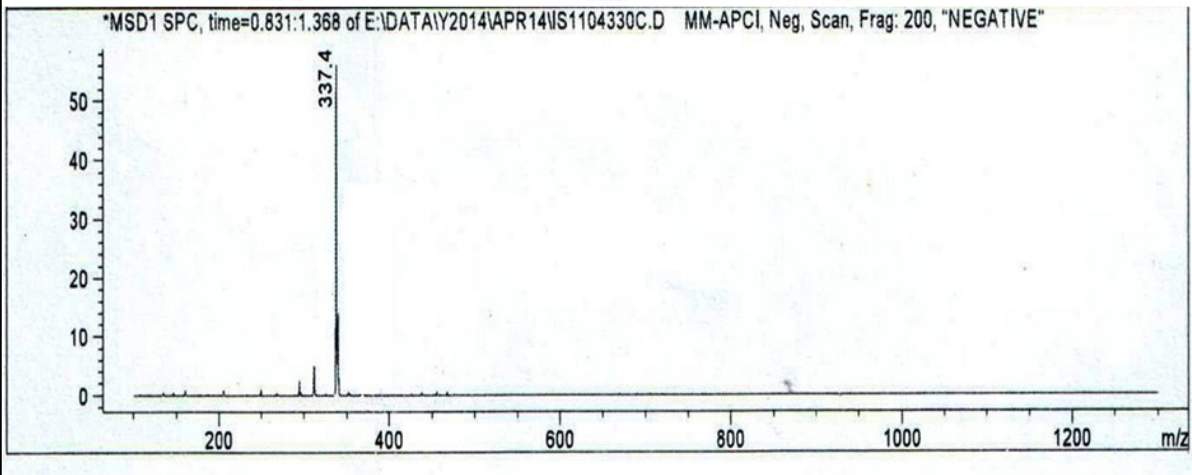

LC-MS SPECTRUM OF COMPOUND PP04

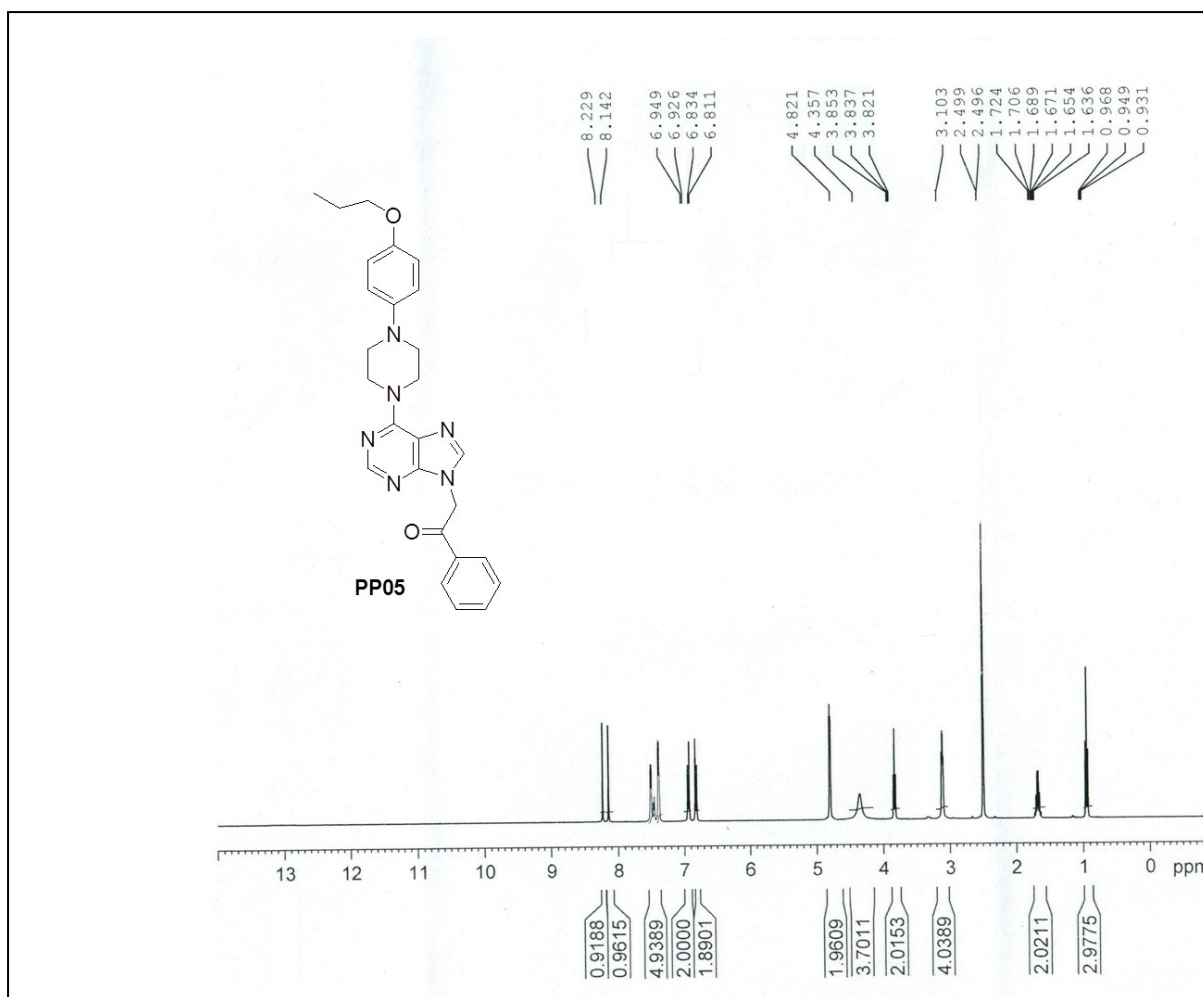

**<sup>1</sup>H NMR SPECTRUM OF COMPOUND PP05**

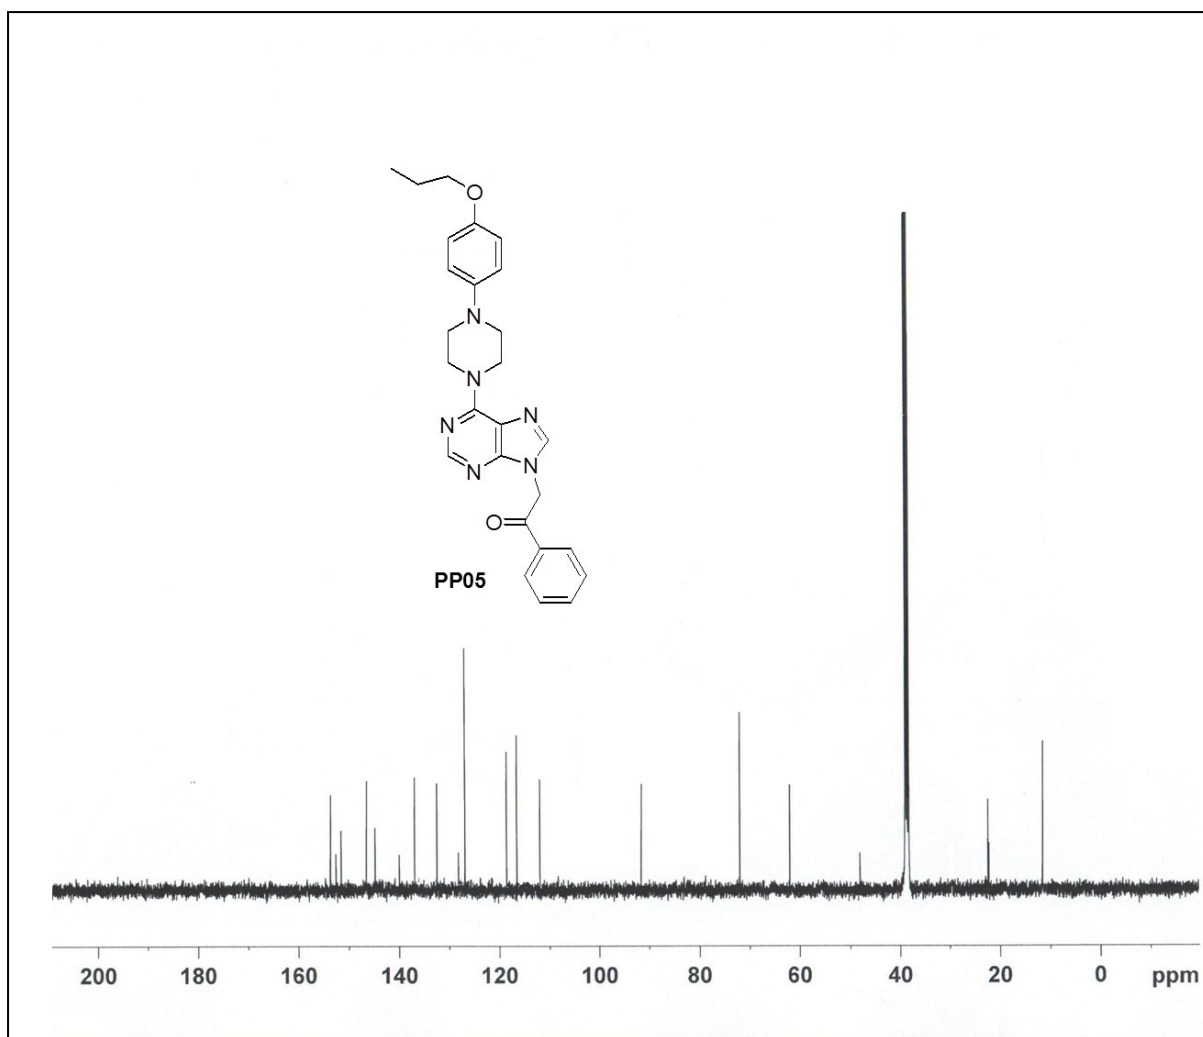

<sup>13</sup>C NMR SPECTRUM OF COMPOUND PP05

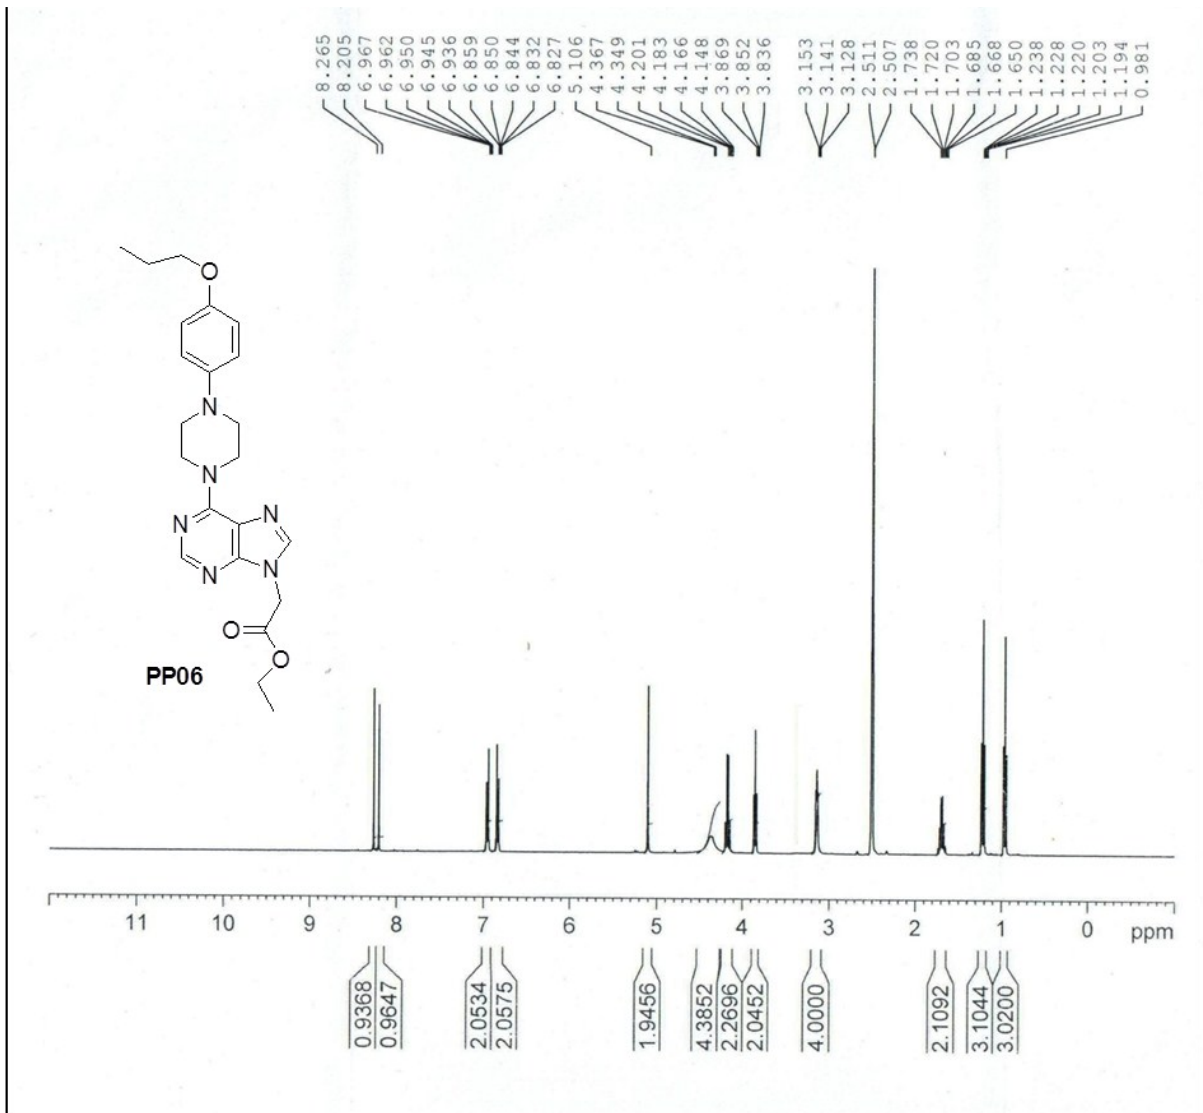

<sup>1</sup>H NMR SPECTRUM OF COMPOUND PP06

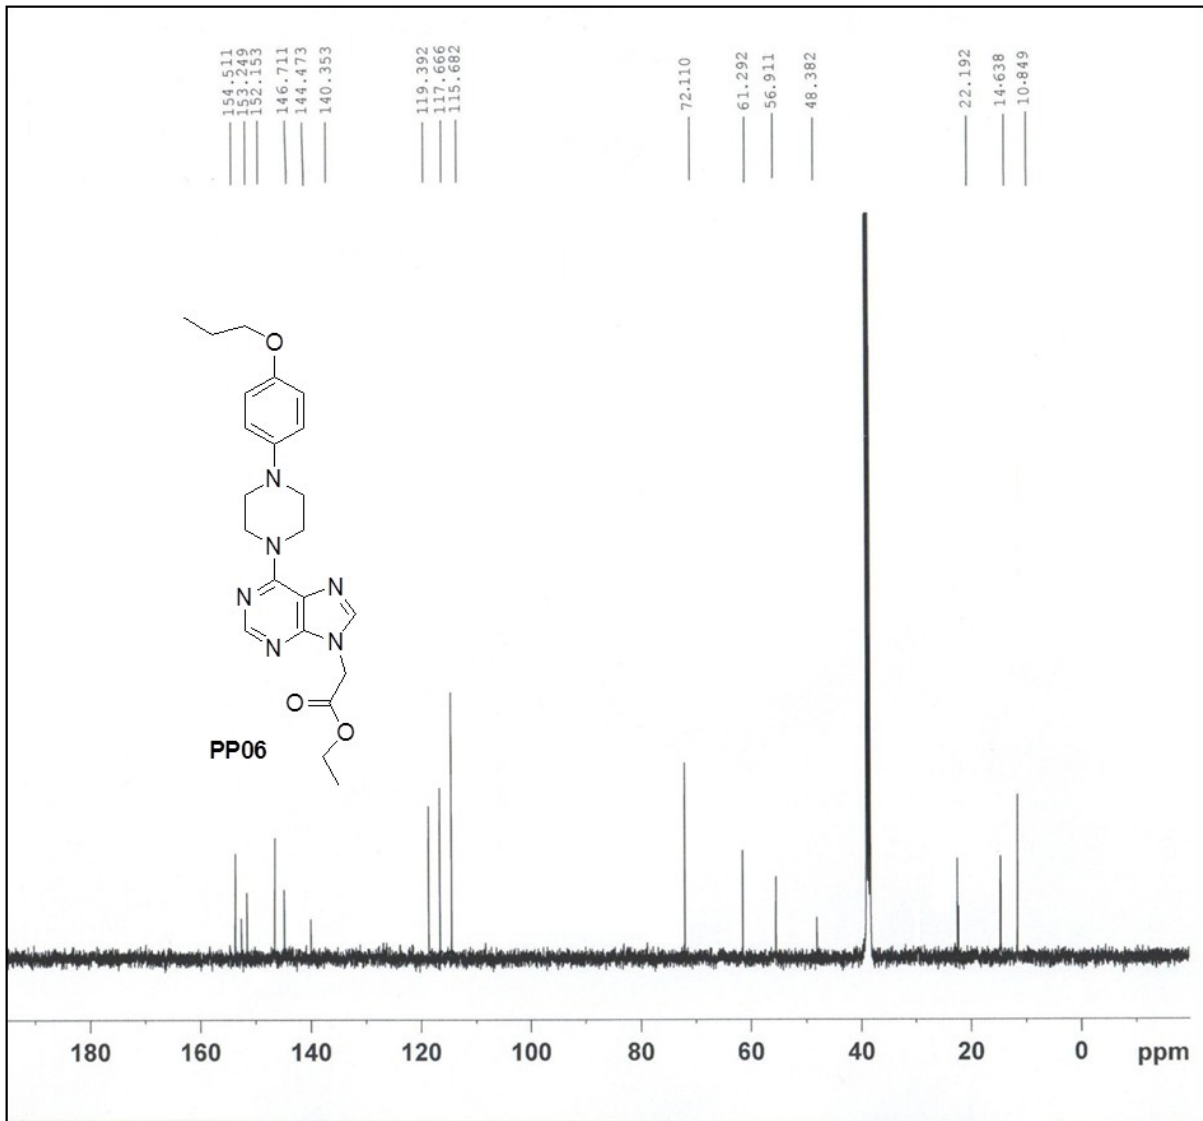

<sup>13</sup>C NMR SPECTRUM OF COMPOUND PP06

Method info : Column-Ascentis C18 (75X4.6mm) 2.7micron,  
 Mobile phase A: ACN B :THF C :0.1%HCOOH in water Flow = 1.0ml/min,  
 Time (min.): %A %B %C  
 0 95 3 2  
 5 80 18 2  
 10 50 48 2  
 10.1 0 98 2  
 12 0 98 2  
 12.1 95 3 2  
 17 95 3 2

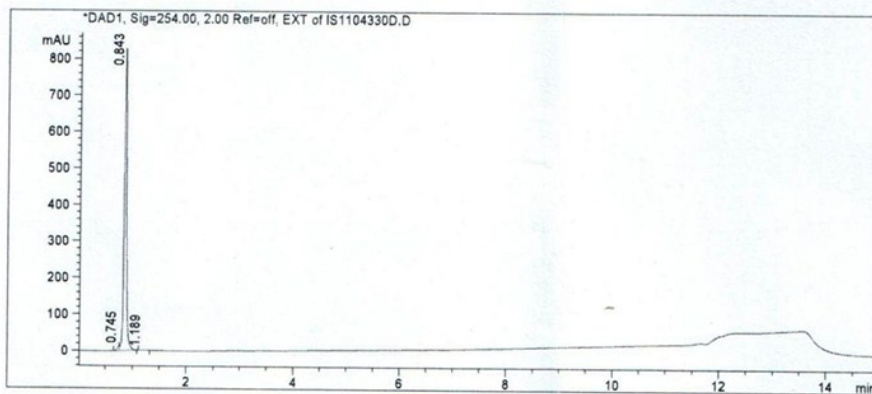

| Peak No | RT min | Area     | Area % |
|---------|--------|----------|--------|
| 1       | 0.745  | 138.893  | 1.414  |
| 2       | 0.843  | 2701.412 | 98.217 |
| 3       | 1.189  | 110.158  | 0.369  |

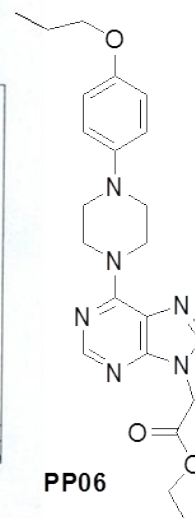

PP06

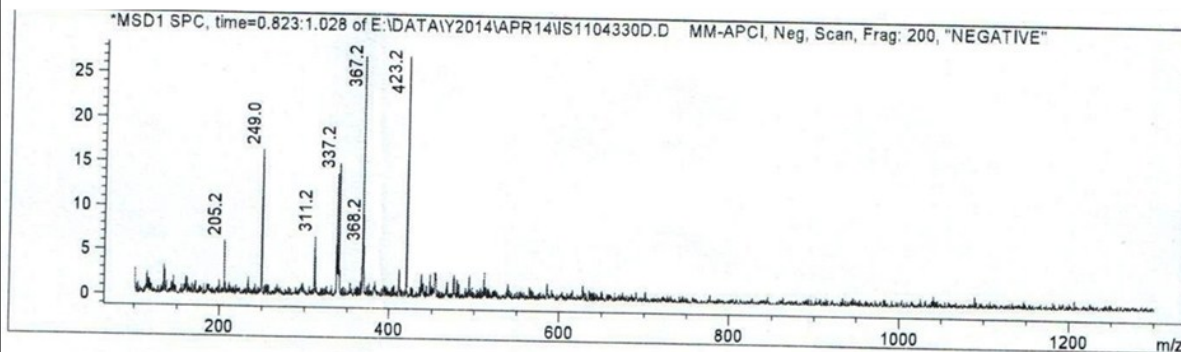

LC-MS SPECTRUM OF COMPOUND PP06



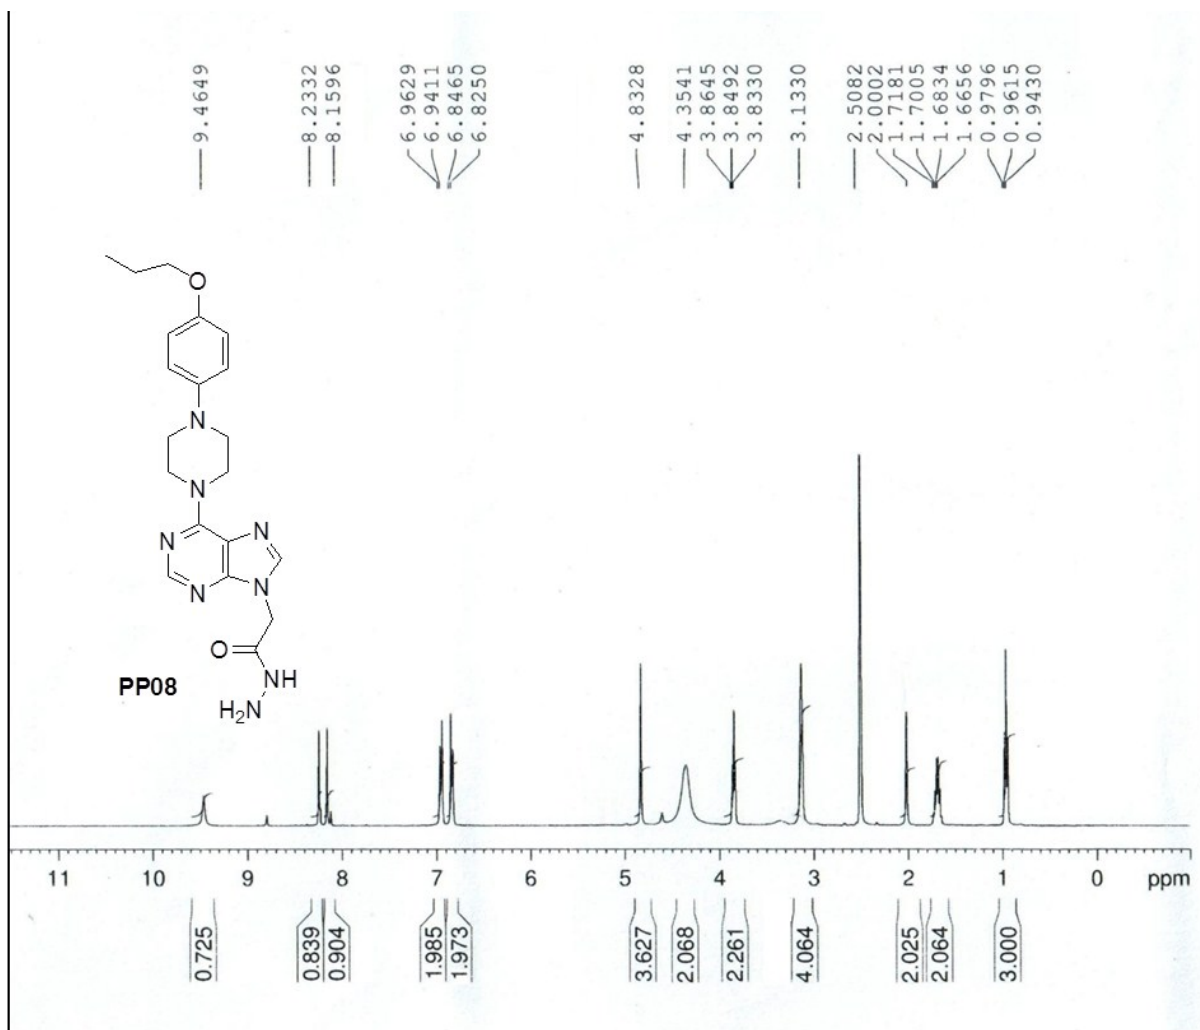

**<sup>1</sup>H NMR SPECTRUM OF COMPOUND PP08**

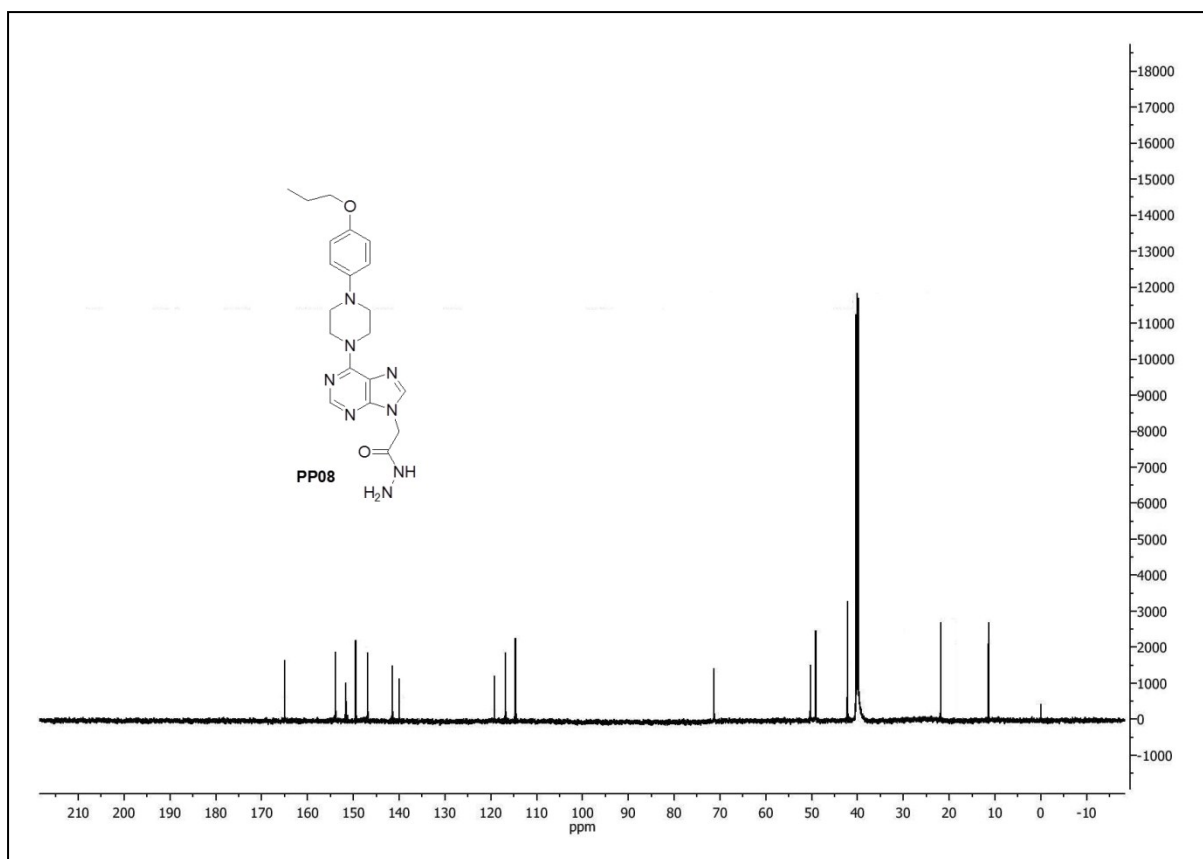

**<sup>13</sup>C NMR SPECTRUM OF COMPOUND PP08**

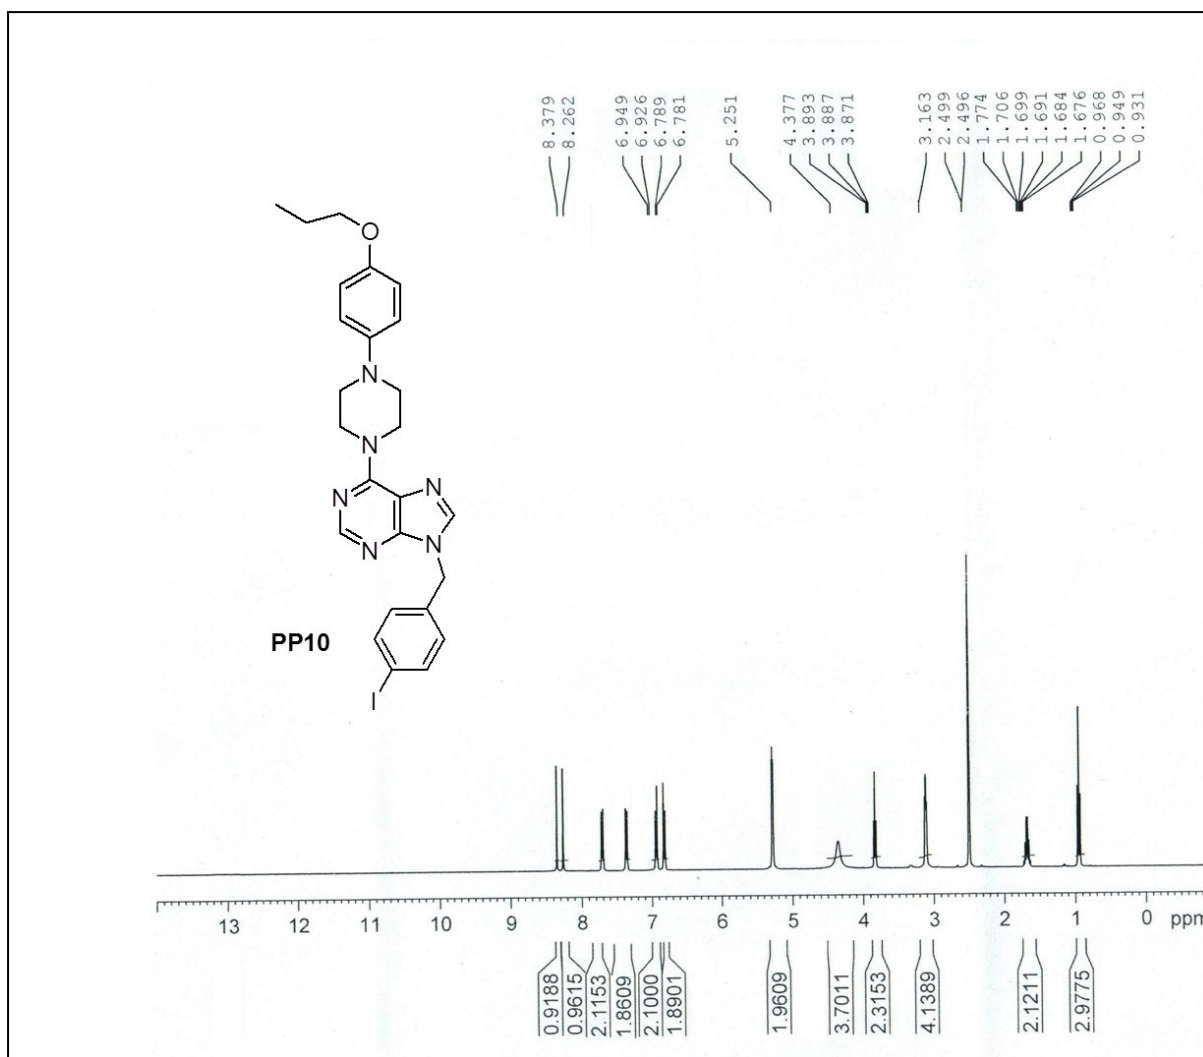

**<sup>1</sup>H NMR SPECTRUM OF COMPOUND PP10**

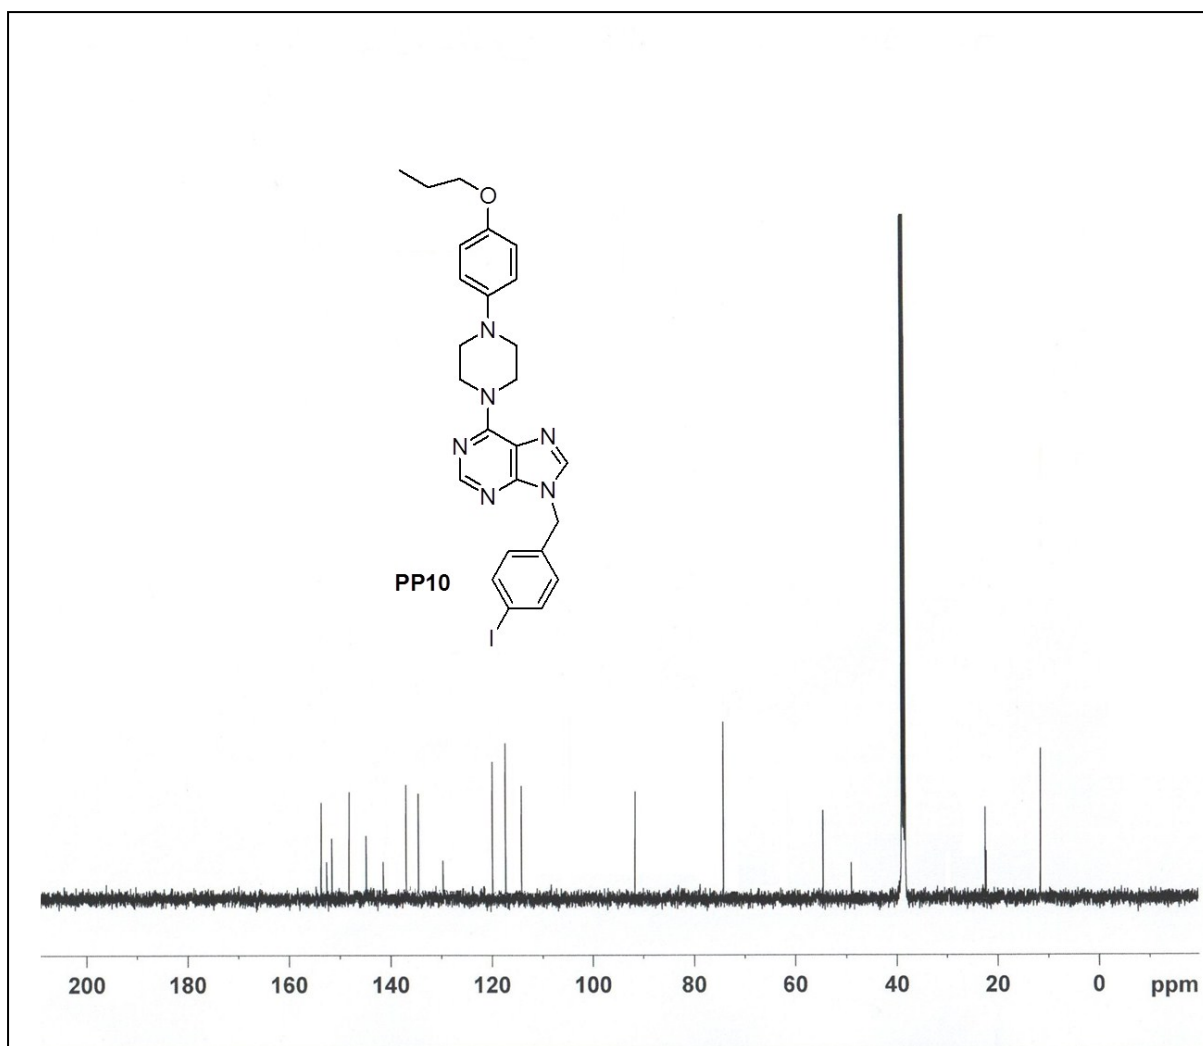

<sup>13</sup>C NMR SPECTRUM OF COMPOUND PP10

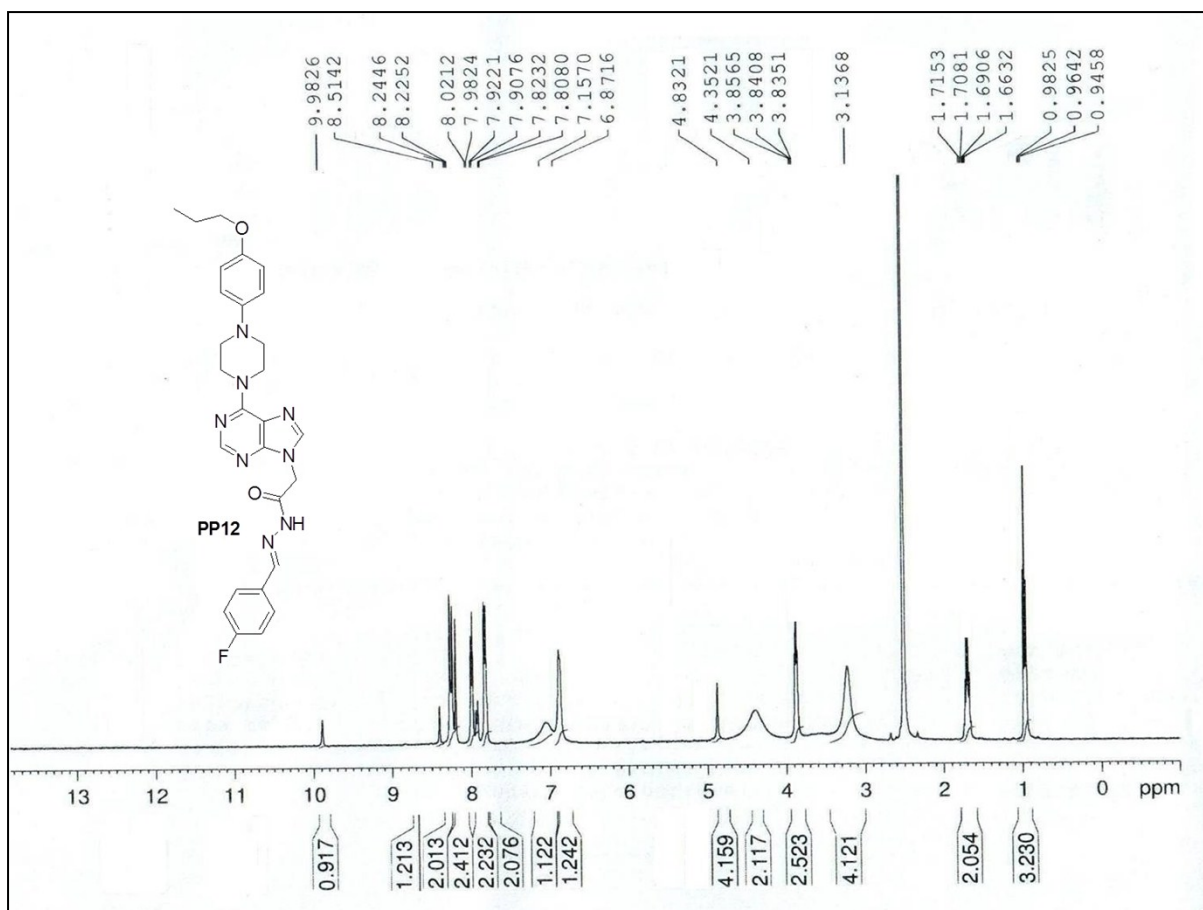

<sup>1</sup>H NMR SPECTRUM OF COMPOUND PP12

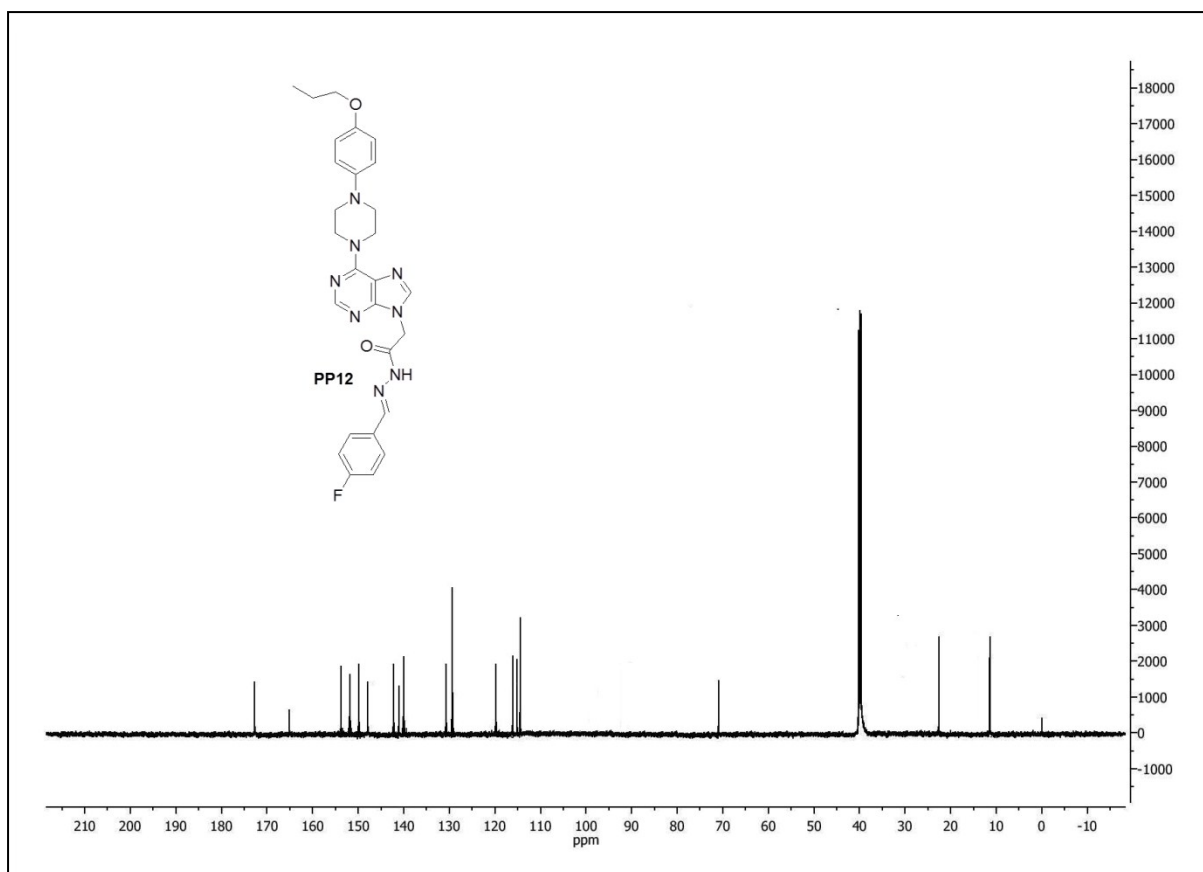

**$^{13}\text{C}$  NMR SPECTRUM OF COMPOUND PP12**

Method info : Column-Ascentis C18 (75X4.6mm) 2.7micron,  
 Mobile phase A: 0.1%CH<sub>3</sub>COOH in 10mM NH<sub>4</sub>OAC B :ACN Flow = 1.0ml/min,  
 Time (min.): %B  
 0 30  
 2.5 30  
 10 95  
 16 95  
 18 30  
 22 30

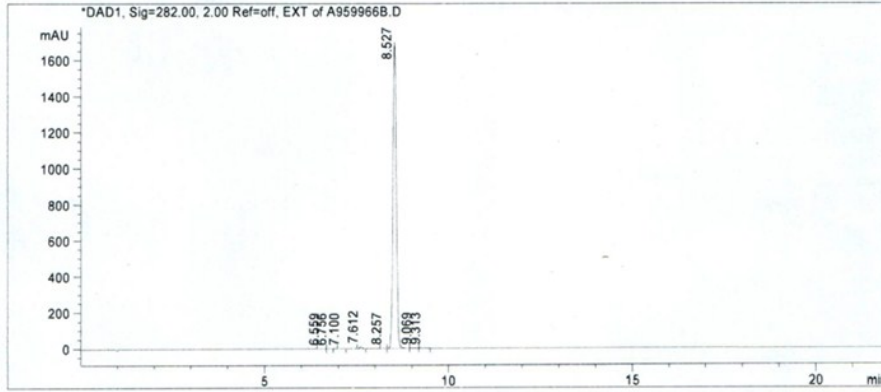

| Peak No | RT min | Area      | Area % |
|---------|--------|-----------|--------|
| 1       | 6.559  | 15.959    | 0.054  |
| 2       | 6.756  | 13.796    | 0.034  |
| 3       | 7.100  | 12.961    | 0.027  |
| 4       | 7.612  | 153.360   | 0.483  |
| 5       | 8.257  | 14.559    | 0.041  |
| 6       | 8.527  | 10956.800 | 99.228 |
| 7       | 9.069  | 16.190    | 0.056  |
| 8       | 9.313  | 18.407    | 0.076  |

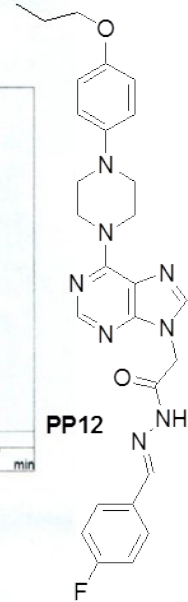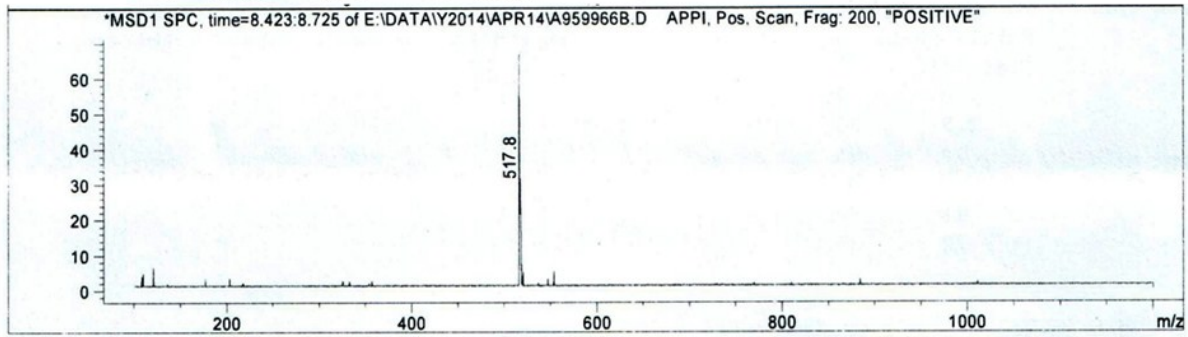

LC-MS SPECTRUM OF COMPOUND PP12

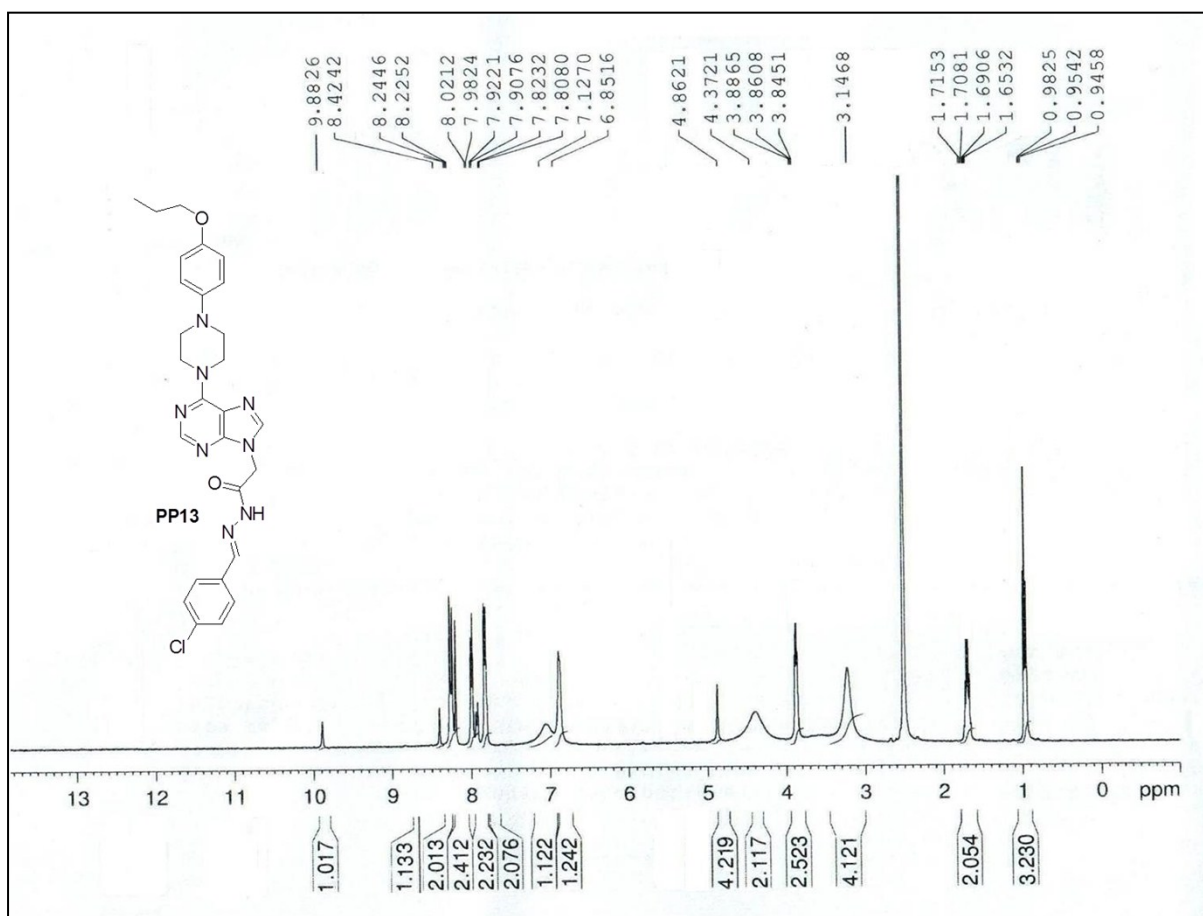

**<sup>1</sup>H NMR SPECTRUM OF COMPOUND PP13**



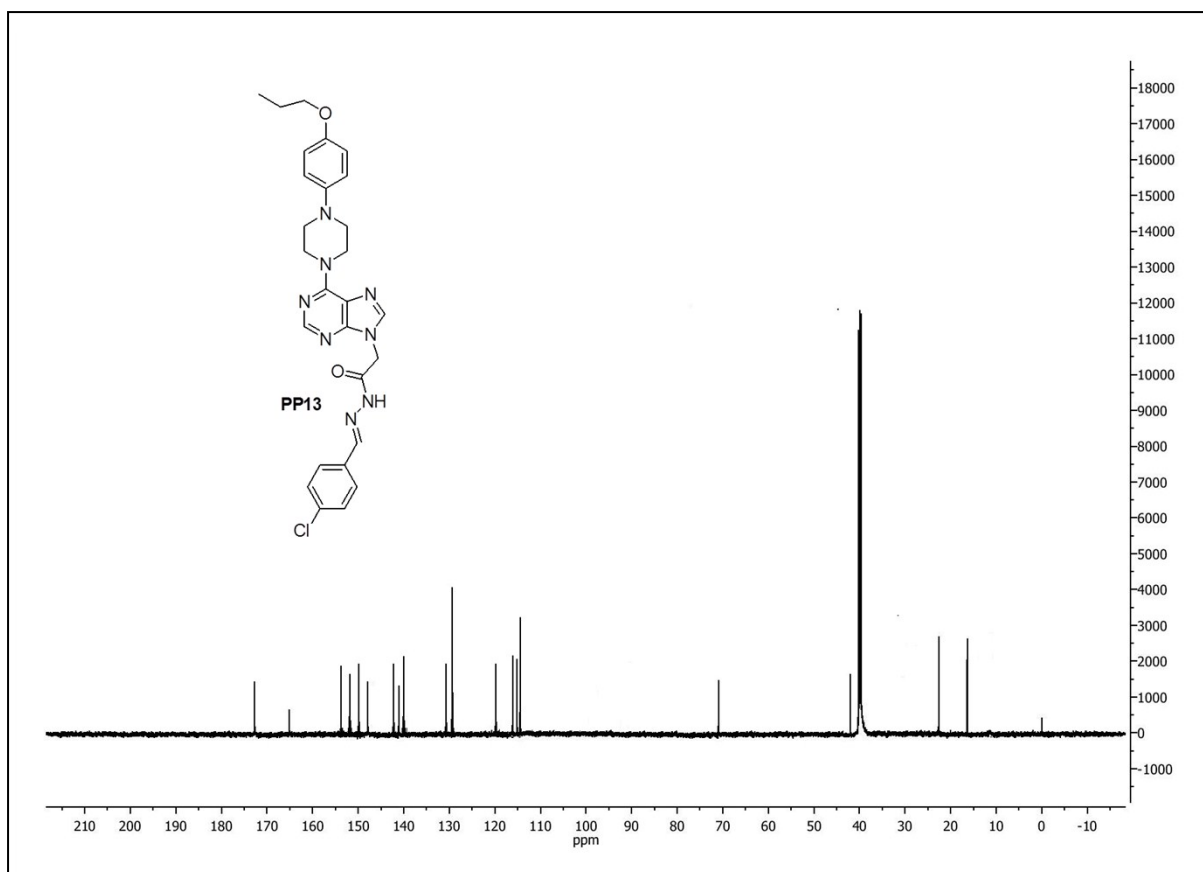

**<sup>13</sup>C NMR SPECTRUM OF COMPOUND PP13**

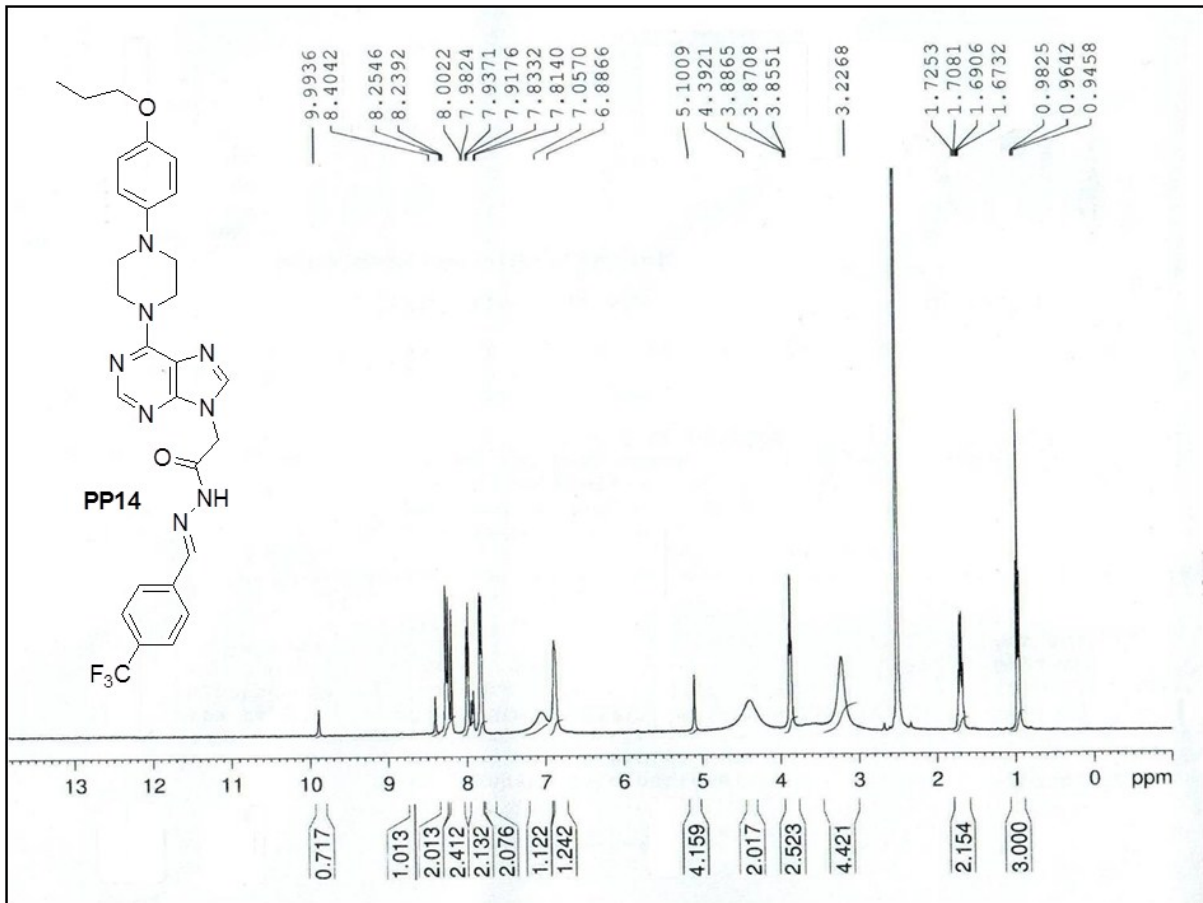

**<sup>1</sup>H NMR SPECTRUM OF COMPOUND PP14**

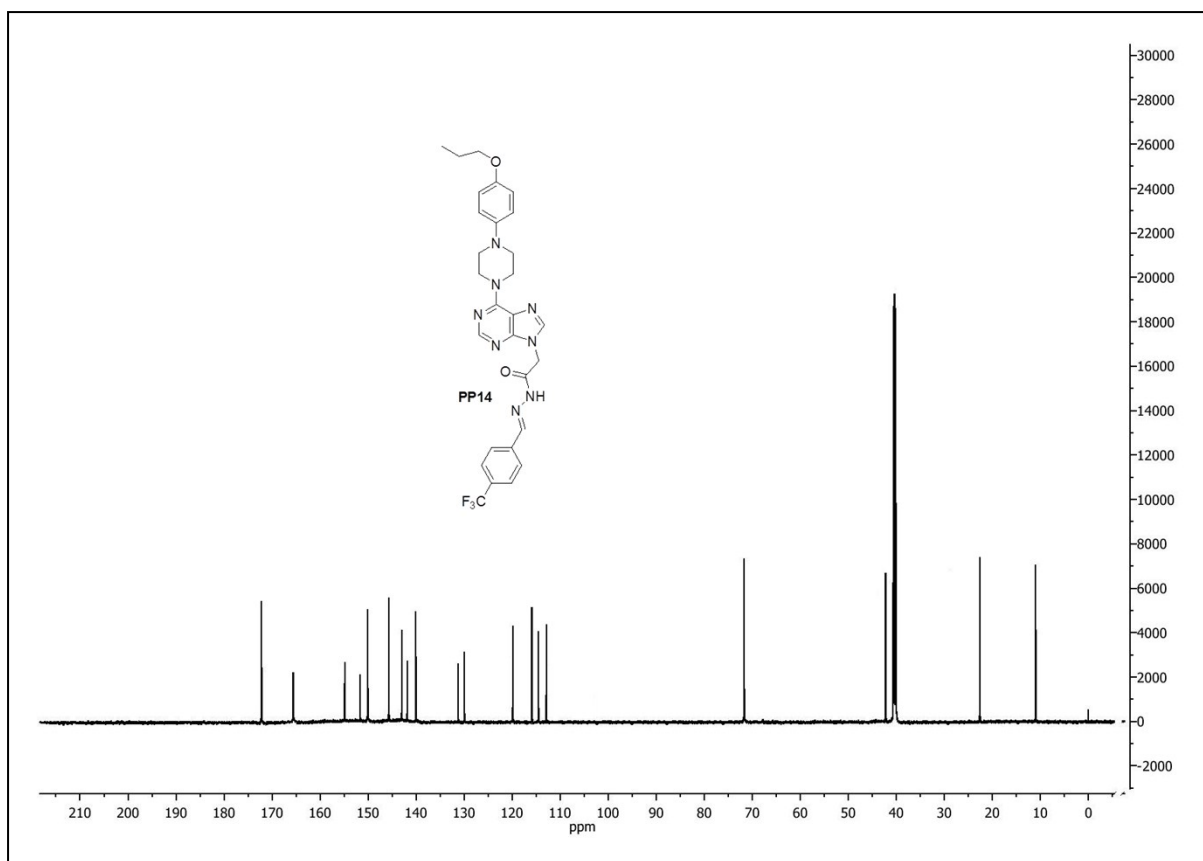

**<sup>13</sup>C NMR SPECTRUM OF COMPOUND PP14**

Method info : Column-Ascentis C18 (75X4.6mm) 2.7micron,  
Mobile phase A: ACN B: THF C: 0.1% HCOOH in water Flow = 1.0ml/min,  
Time (min.): %A %B %C  
0 95 3 2  
5 80 18 2  
10 50 48 2  
10.1 0 98 2  
12 0 98 2  
12.1 95 3 2  
17 95 3 2

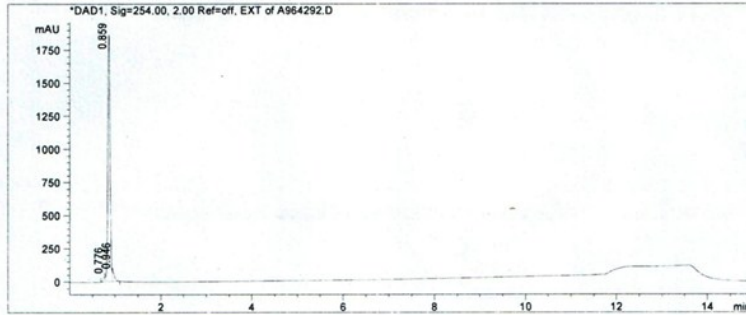

| Peak No | RT min | Area      | Area % |
|---------|--------|-----------|--------|
| 1       | 10.776 | 115.664   | 1.746  |
| 2       | 10.859 | 16311.900 | 95.295 |
| 3       | 10.946 | 1195.961  | 2.959  |

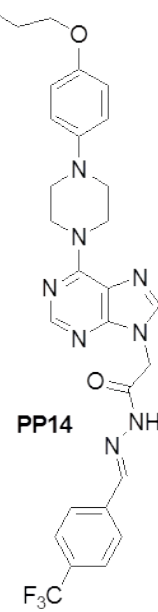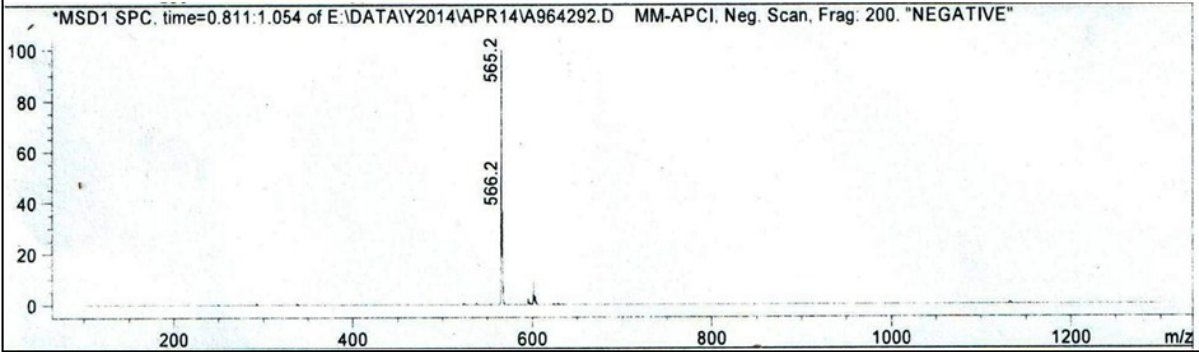

LC-MS SPECTRUM OF COMPOUND PP14

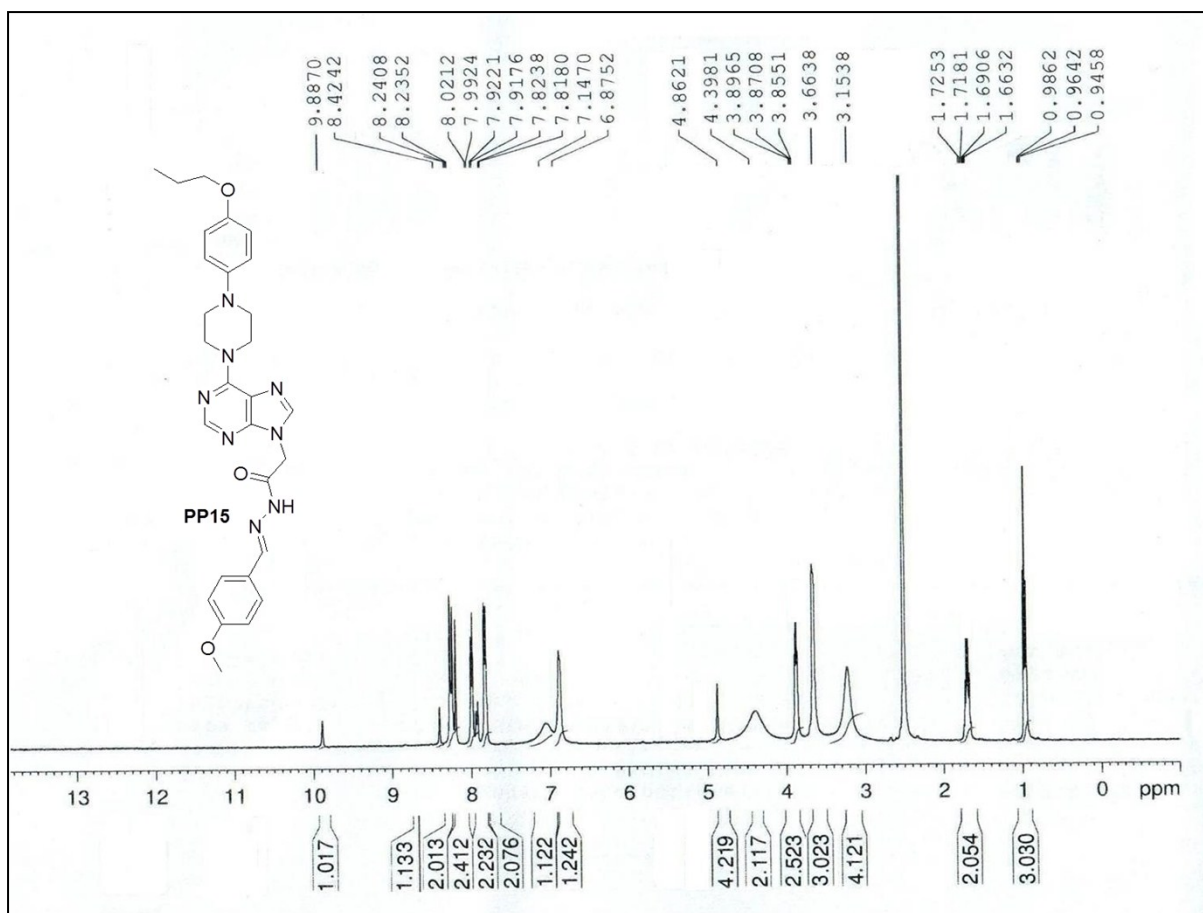

**<sup>1</sup>H NMR SPECTRUM OF COMPOUND PP15**

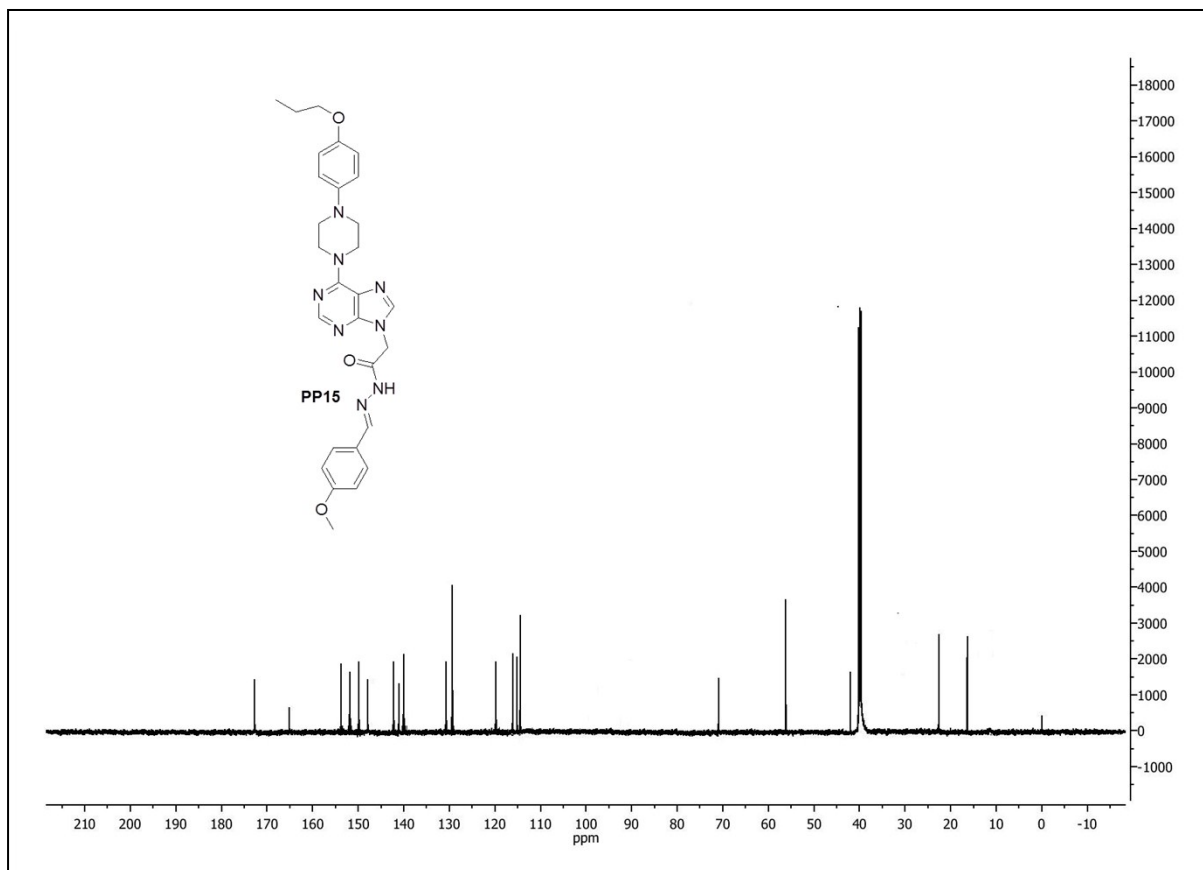

**<sup>13</sup>C NMR SPECTRUM OF COMPOUND PP15**

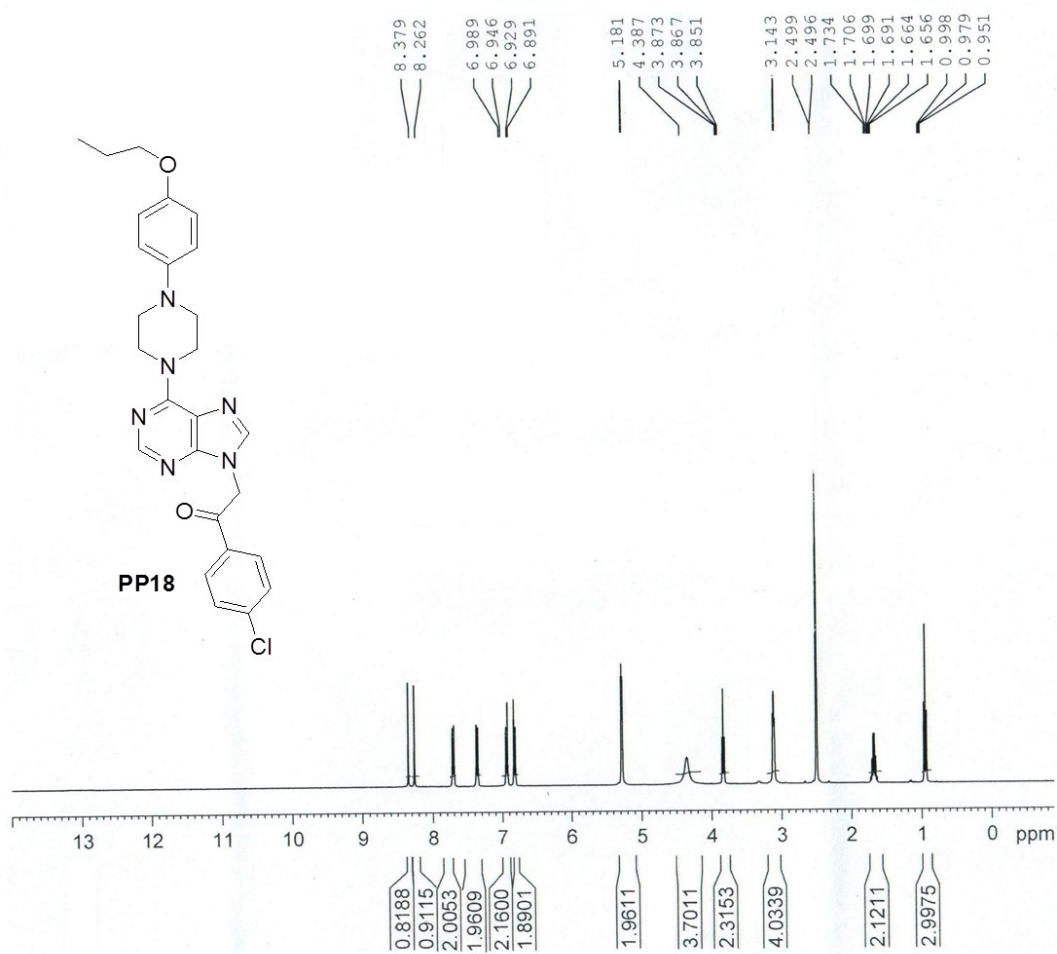

**<sup>1</sup>H NMR SPECTRUM OF COMPOUND PP18**

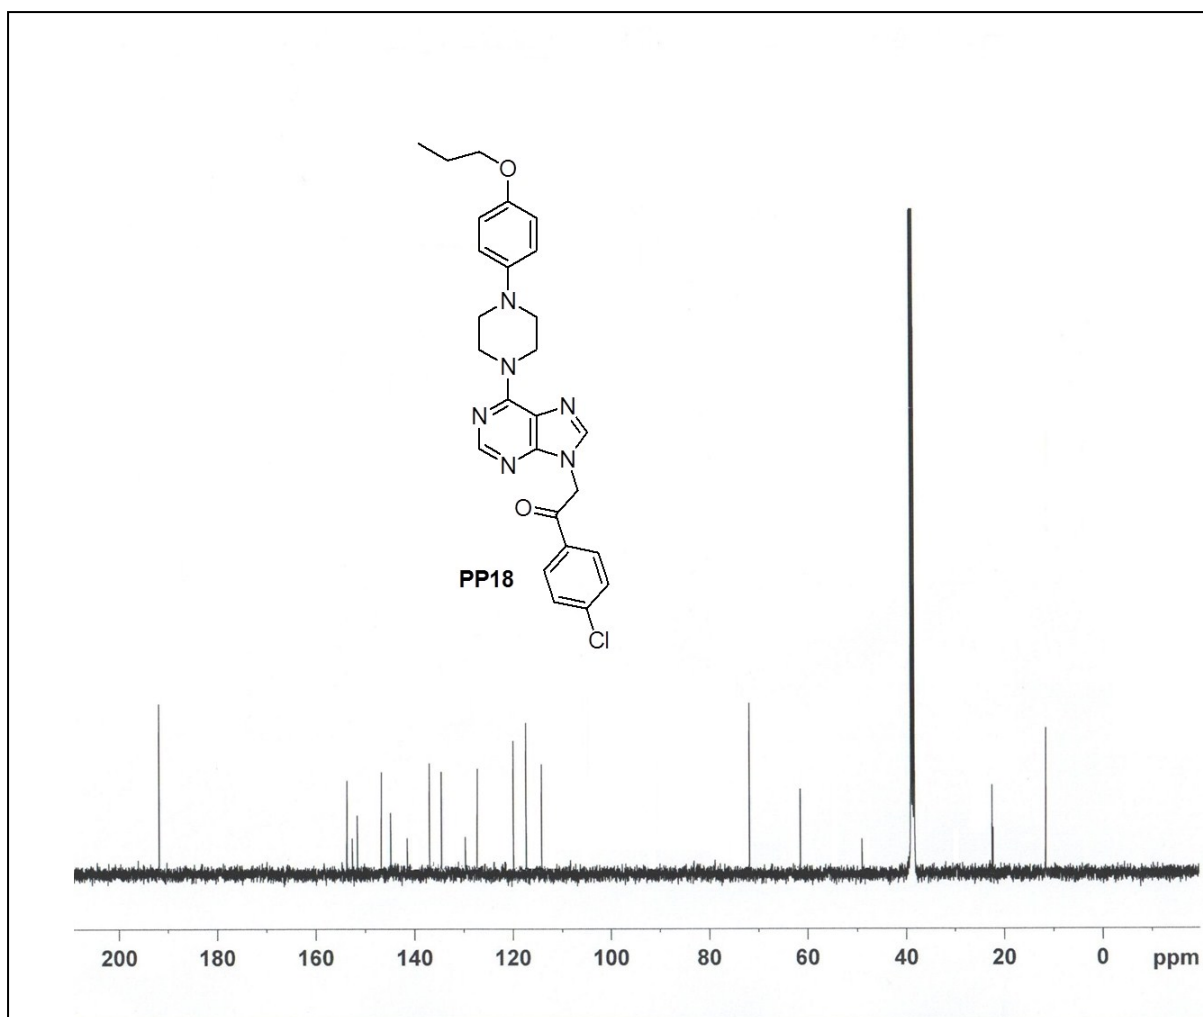

$^{13}\text{C}$  NMR SPECTRUM OF COMPOUND PP18



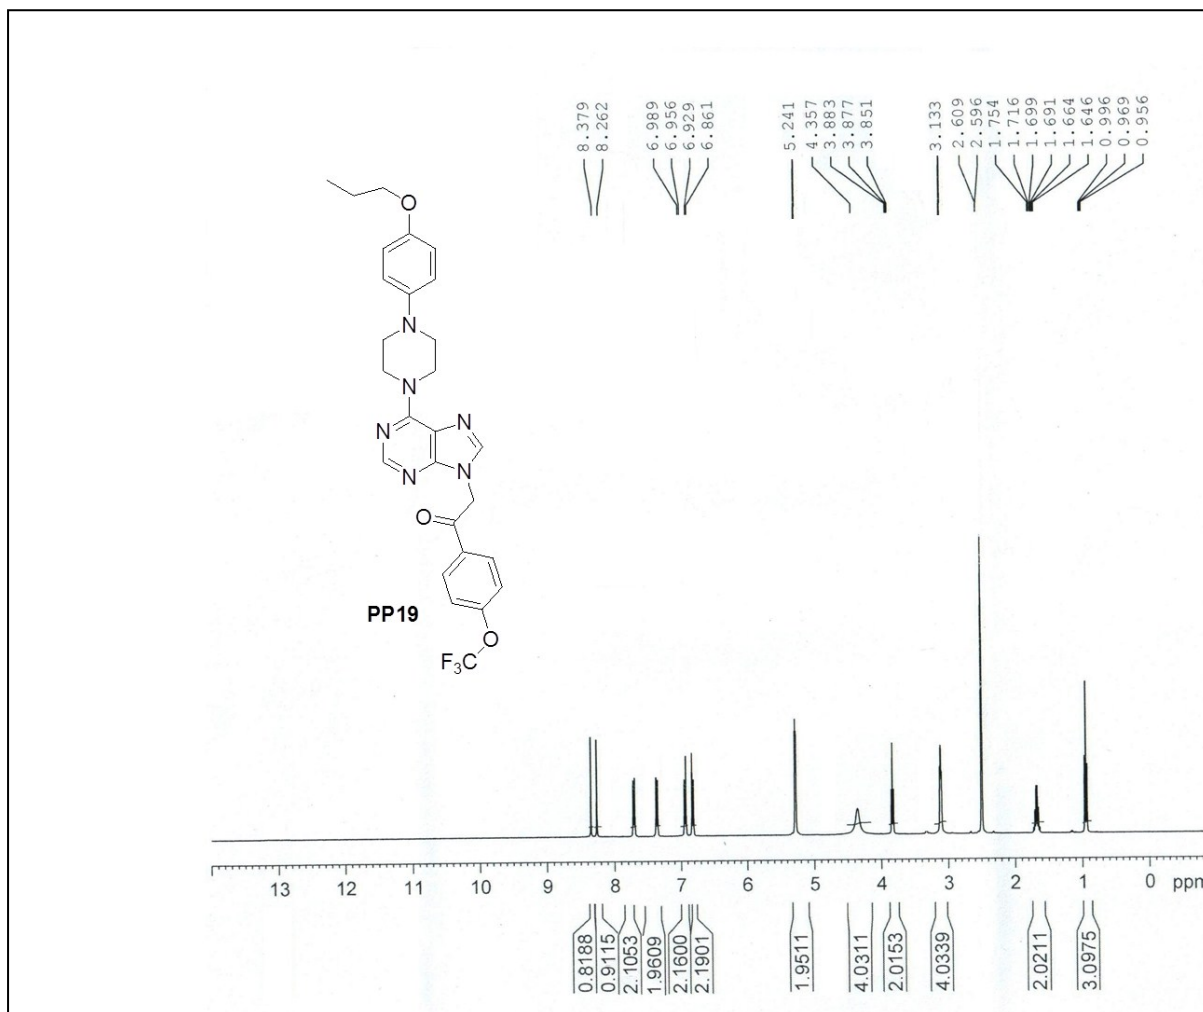

**<sup>1</sup>H NMR SPECTRUM OF COMPOUND PP19**

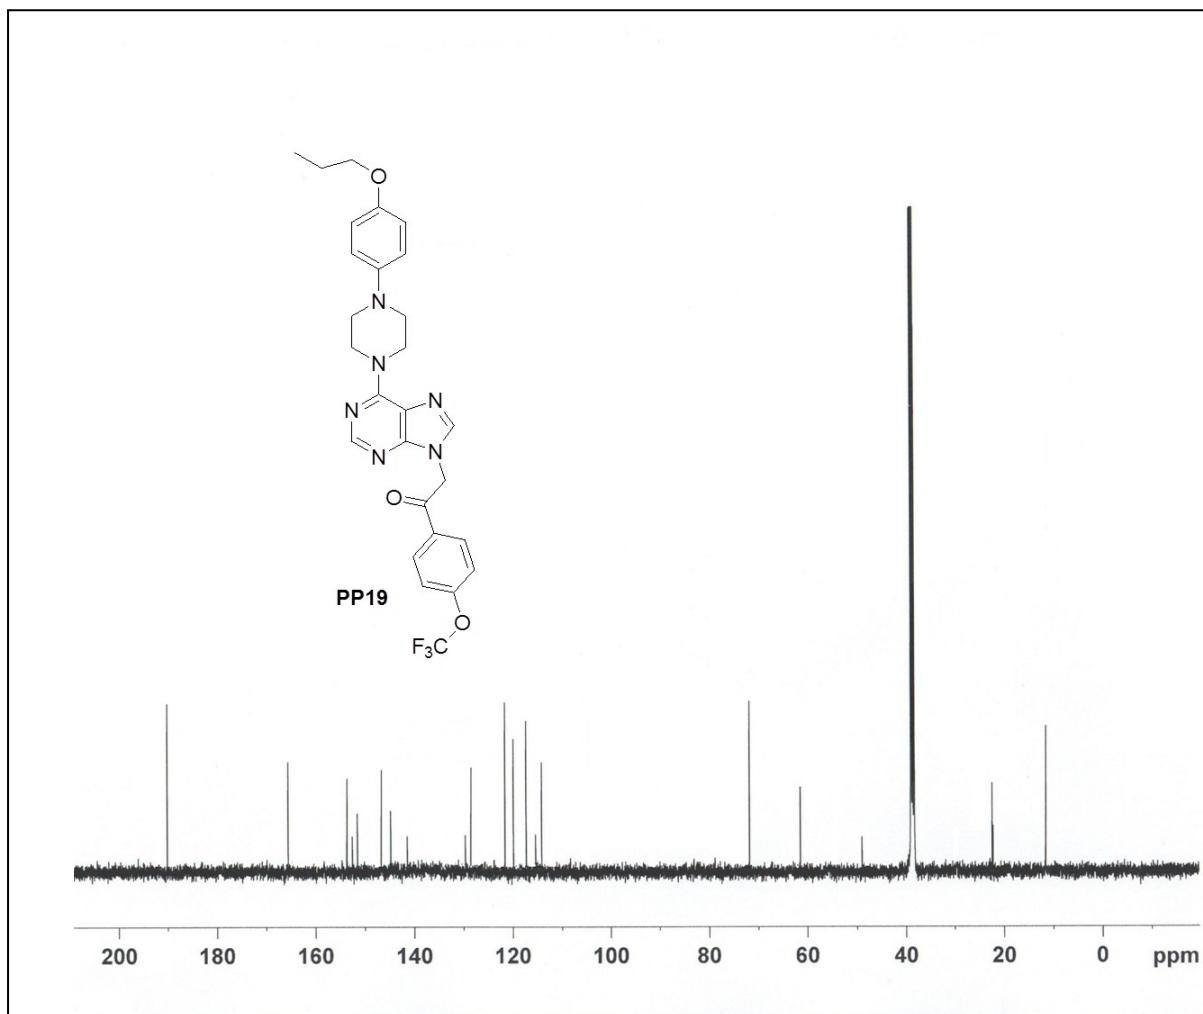

$^{13}\text{C}$  NMR SPECTRUM OF COMPOUND PP19
